# Supplementary material for: Ruthenium tris(σ-B–H) borate complexes: synthesis, structure, and reactivity
Source: Royal Society of Chemistry journal article supplement (doi:10.1039/d2dt03092f), 2022-01-01
Supplement: d2dt03092f1.pdf [file d2dt03092f1.pdf]

**Electronic supplementary information**

**for**

**Ruthenium tris( $\sigma$ -B-H) borate complexes: synthesis,  
structure, and reactivity**

Yongliang Wei, Xiaowen Yang, Minghui Tian, Xue Wang and Tongdao Wang\*

Zhang Dayu School of Chemistry, Dalian University of Technology, Dalian 116024, P.  
R. China. Email: wangtd@dlut.edu.cn

## Contents

|                                                                                    |     |
|------------------------------------------------------------------------------------|-----|
| General information .....                                                          | S3  |
| NMR spectra and crystallographic data of compound <b>3a</b> .....                  | S4  |
| NMR spectra and crystallographic data of compound <b>3b</b> .....                  | S8  |
| NMR spectra and crystallographic data of compound <b>3c</b> .....                  | S11 |
| Thermal stability tests of ruthenium tris( $\sigma$ -B-H)borates <b>3a-c</b> ..... | S14 |
| Reaction of <b>3a</b> with D <sub>2</sub> .....                                    | S15 |
| Reaction of <b>3a-D</b> with HBpin .....                                           | S16 |
| NMR spectra and crystallographic data of compound <b>4a</b> .....                  | S18 |
| NMR spectra and crystallographic data of compound <b>4b</b> .....                  | S22 |
| NMR spectra and crystallographic data of compound <b>4c</b> .....                  | S26 |
| Computational details .....                                                        | S30 |

## General information

**X-ray diffraction:** Single-crystal X-ray diffraction data were collected on a Bruker Smart APEX II CCD single-crystal diffractometer or a Bruker D8 Venture diffractometer equipped with a Photon 100 CMOS detector using  $\text{MoK}_\alpha$  radiation ( $\lambda = 0.71073 \text{ \AA}$ ). All of the data were corrected for absorption effects using the multi-scan technique. Final unit cell parameters were based on all observed reflections from integration of all frame data. The structures were solved with the ShelXT structure solution program using Intrinsic Phasing and refined with the ShelXL refinement package using Least Squares minimization that implanted in Olex2. For all compounds, all non-H atoms were refined anisotropically unless otherwise stated, and hydrogen atoms were introduced at their geometric positions and refined as riding atoms unless otherwise stated. *Exceptions and special features:* For compounds **3a** and **3c** the  $\text{C}_5\text{Me}_5$  group, for compound **3b** the Tipp group were found disordered over two positions. Several restraints (SADI, SIMU, ISOR, EADP and EXYZ) were used in order to improve refinement stability. CCDC 2194525-2194527, 2150382, 2150385 and 2150386 contain the supplementary crystallographic data for this paper. These data can be obtained free of charge from The Cambridge Crystallographic Data Centre via [www.ccdc.cam.ac.uk/structures/](http://www.ccdc.cam.ac.uk/structures/).

## NMR spectra and crystallographic data of compound 3a

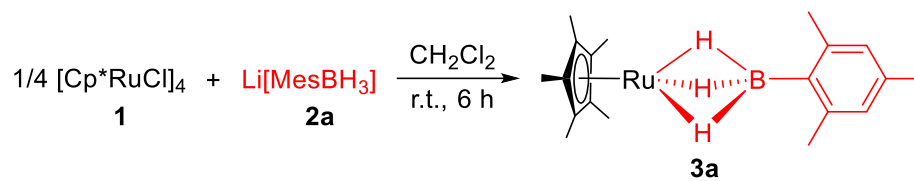

Scheme S1

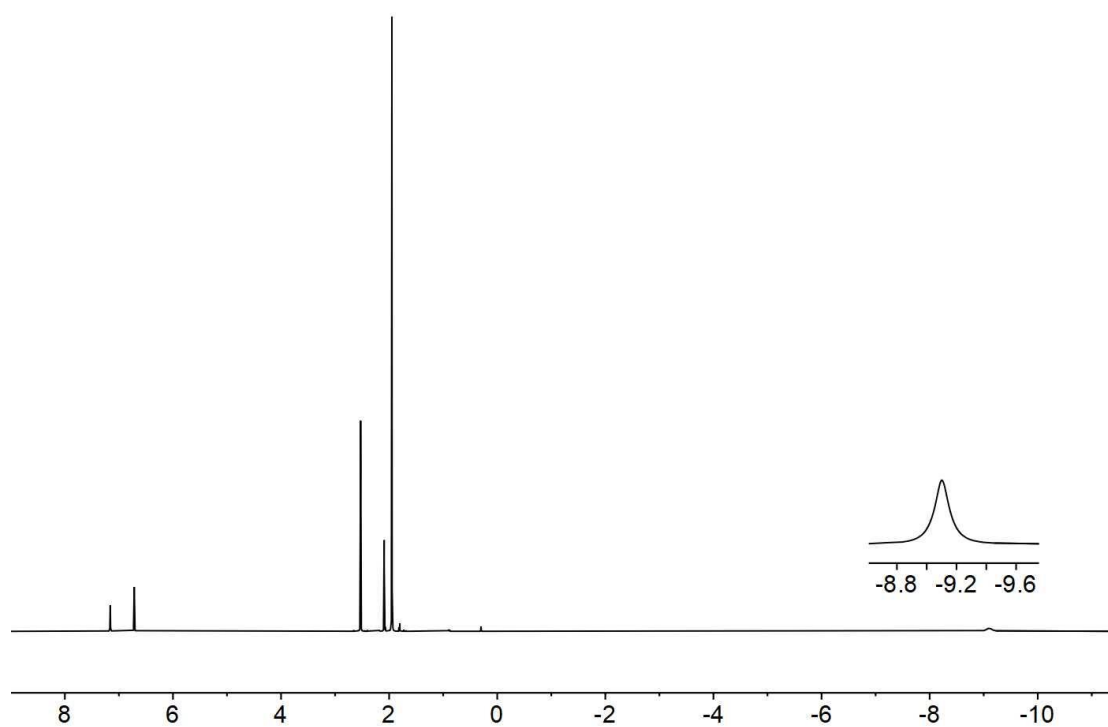

Figure S1.  $^1\text{H}$  NMR (400 MHz, 298 K,  $\text{C}_6\text{D}_6$ ) spectrum of compound 3a.

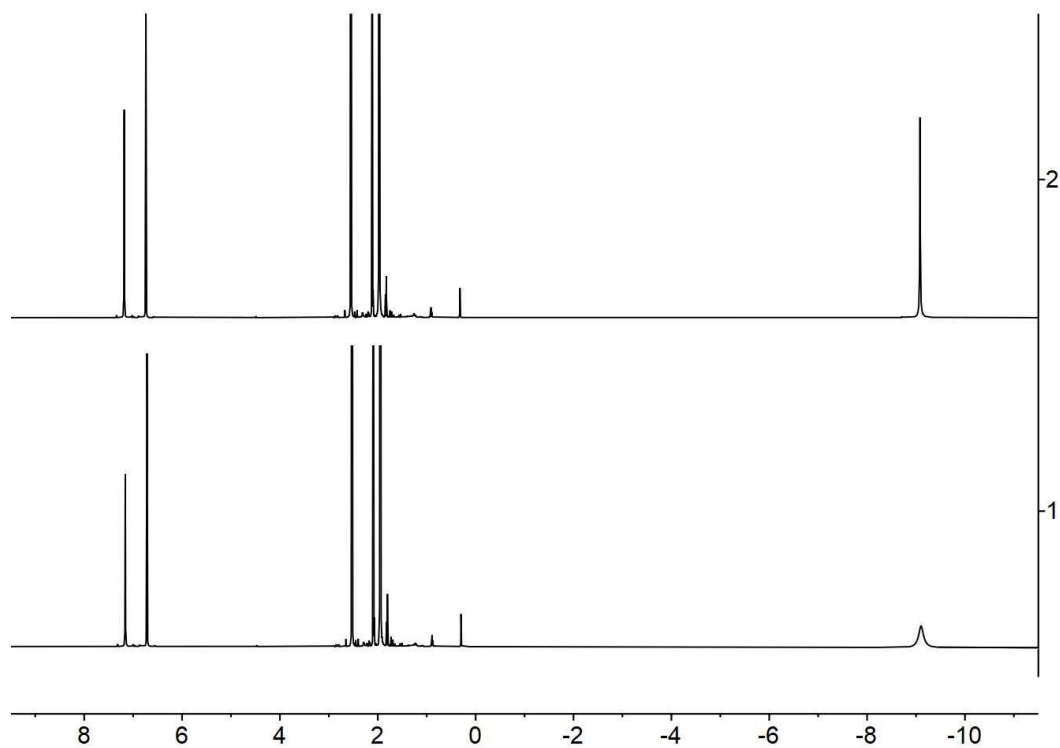

**Figure S2.** (1)  $^1\text{H}$  NMR (400 MHz, 298 K,  $\text{C}_6\text{D}_6$ ) and (2)  $^1\text{H}\{^{11}\text{B}\}$  NMR (400 MHz, 298 K,  $\text{C}_6\text{D}_6$ ) spectra of compound **3a**.

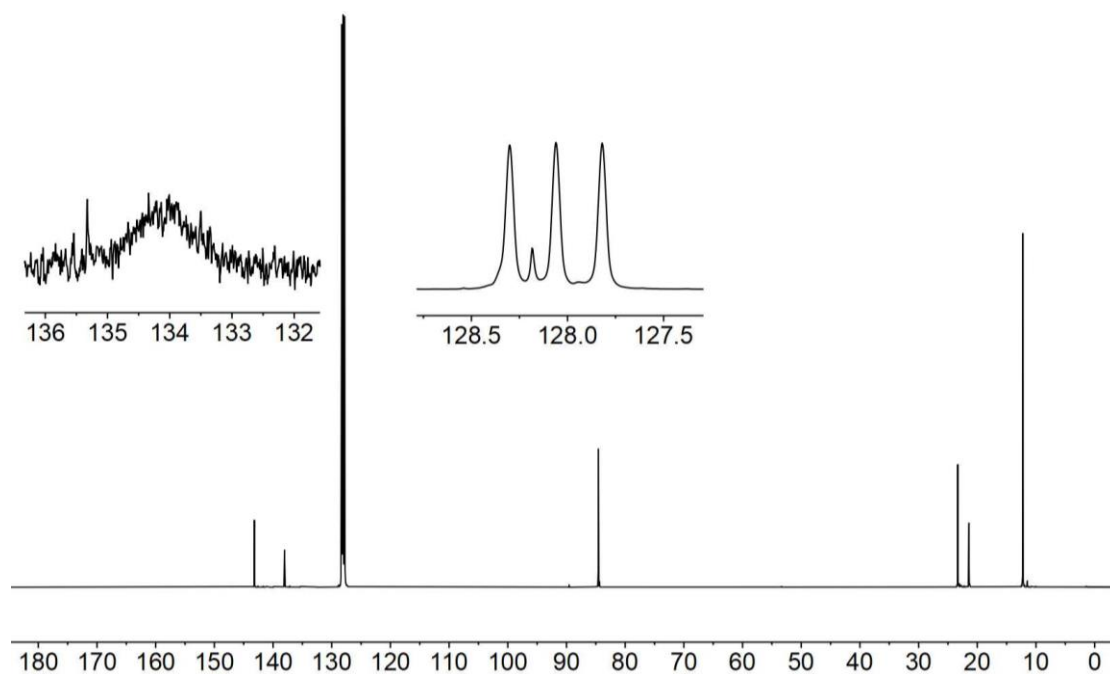

**Figure S3.**  $^{13}\text{C}\{^1\text{H}\}$  NMR (101 MHz, 298 K,  $\text{C}_6\text{D}_6$ ) spectrum of compound **3a**.

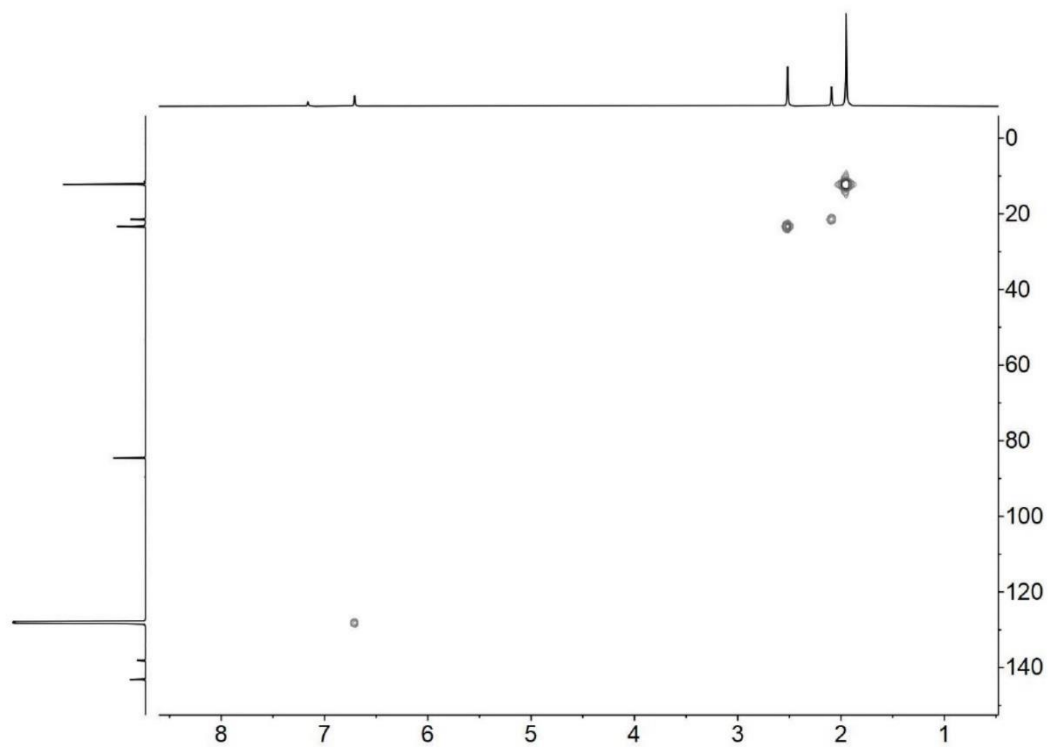

**Figure S4.**  $^1\text{H}$ - $^{13}\text{C}$  GHSQC (400 MHz/101 MHz, 298 K,  $\text{C}_6\text{D}_6$ ) spectrum of compound **3a**.

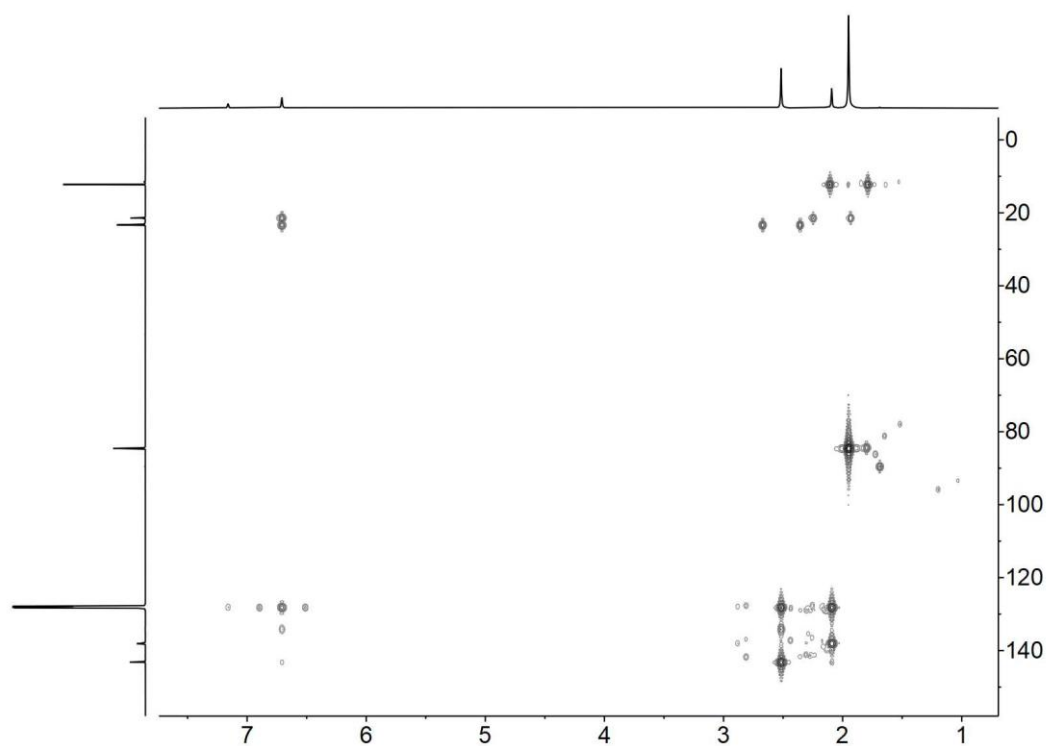

**Figure S5.**  $^1\text{H}$ - $^{13}\text{C}$  GHMBC (400 MHz/101 MHz, 298 K,  $\text{C}_6\text{D}_6$ ) spectrum of compound **3a**.

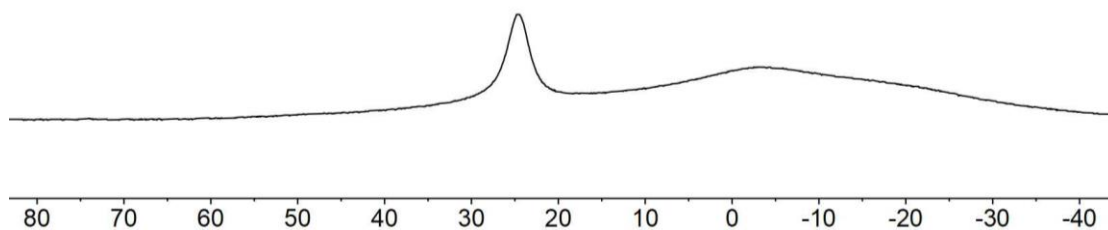

**Figure S6.**  $^{11}\text{B}$  NMR (128 MHz, 298 K,  $\text{C}_6\text{D}_6$ ) spectrum of compound **3a**.

**X-ray crystal structure analysis of compound 3a:** formula  $\text{C}_{19}\text{H}_{29}\text{BRu}$ ,  $M = 369.30$ , yellow crystal, 0.35 x 0.15 x 0.1 mm,  $a = 17.5721(3)$ ,  $b = 7.85900(10)$ ,  $c = 27.1629(4)$  Å,  $\alpha = 90$ ,  $\beta = 97.2870(10)$ ,  $\gamma = 90^\circ$ ,  $V = 3720.88(10)$  Å<sup>3</sup>,  $\rho_{\text{calc}} = 1.318$  g·cm<sup>-3</sup>,  $\mu = 0.835$  mm<sup>-1</sup>, empirical absorption correction ( $0.6805 \leq T \leq 0.7456$ ),  $Z = 8$ , monoclinic, space group  $P2_1/n$  (No. 14),  $\lambda = 0.71073$  Å,  $T = 173$  K,  $\omega$  and  $\varphi$  scans, 17923 reflections collected ( $\pm h, \pm k, \pm l$ ), 8180 independent ( $R_{\text{int}} = 0.0250$ ) and 6766 observed reflections [ $I > 2\sigma(I)$ ], 236 refined parameters,  $R = 0.0260$ ,  $wR^2 = 0.0637$ , max. (min.) residual electron density 0.41 (-0.41) e·Å<sup>-3</sup>.

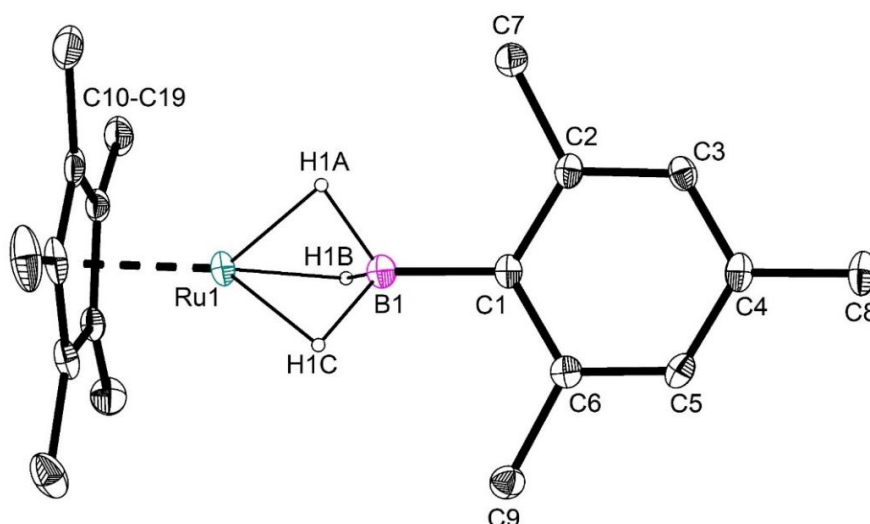

**Figure S7.** Molecular structure of compound **3a** (thermal ellipsoids are shown at the 30% probability level).

## NMR spectra and crystallographic data of compound **3b**

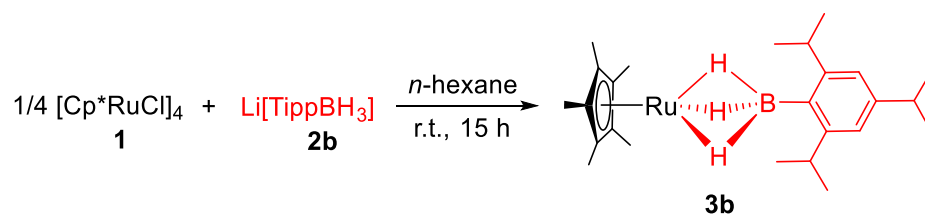

**Scheme S2**

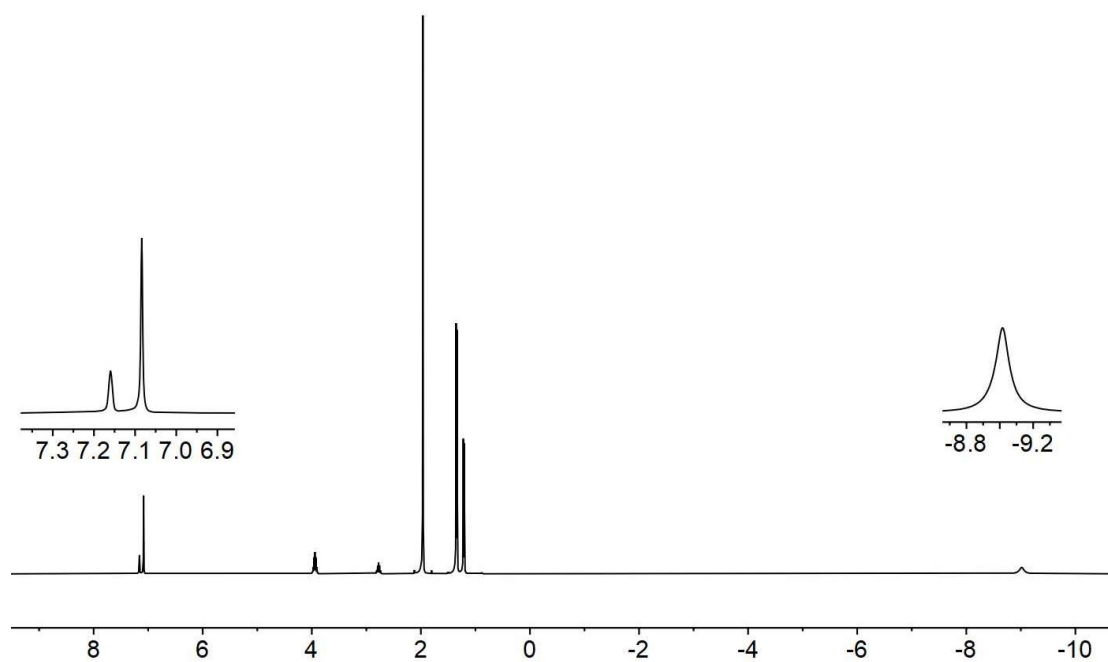

**Figure S8.**  $^1\text{H}$  NMR (400 MHz, 298 K,  $\text{C}_6\text{D}_6$ ) spectrum of compound **3b**.



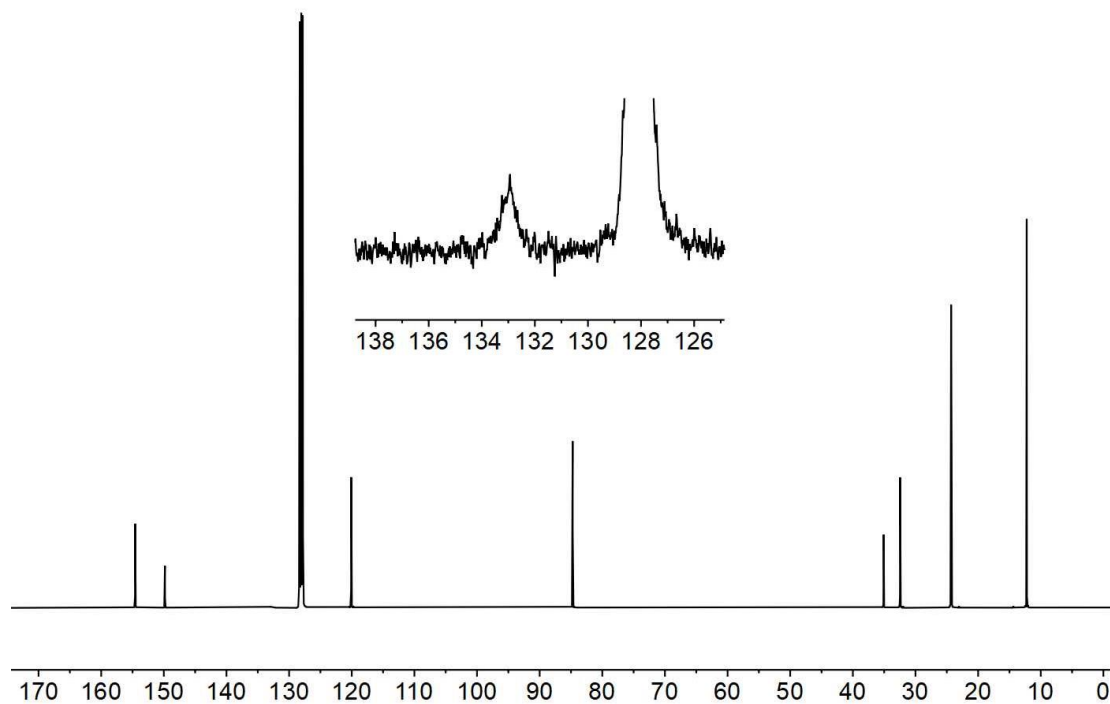

**Figure S9.**  $^{13}\text{C}\{^1\text{H}\}$  NMR (101 MHz, 298 K,  $\text{C}_6\text{D}_6$ ) spectrum of compound **3b**.

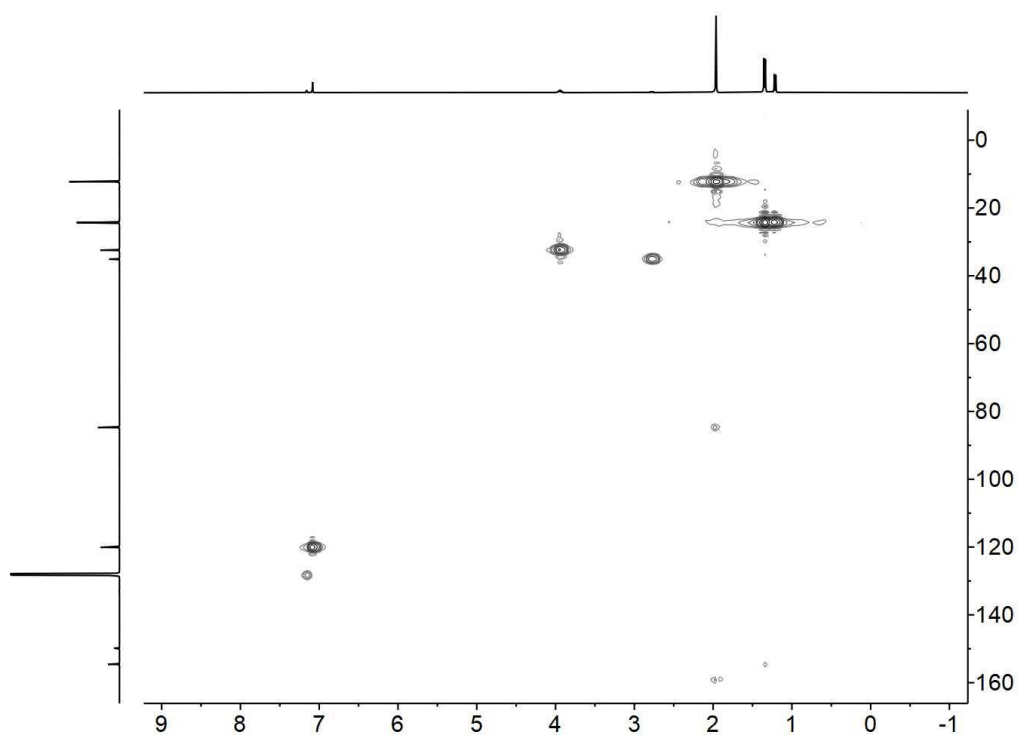

**Figure S10.**  $^1\text{H}$ - $^{13}\text{C}$  GHSQC (400 MHz/101 MHz, 298 K,  $\text{C}_6\text{D}_6$ ) spectrum of compound **3b**.

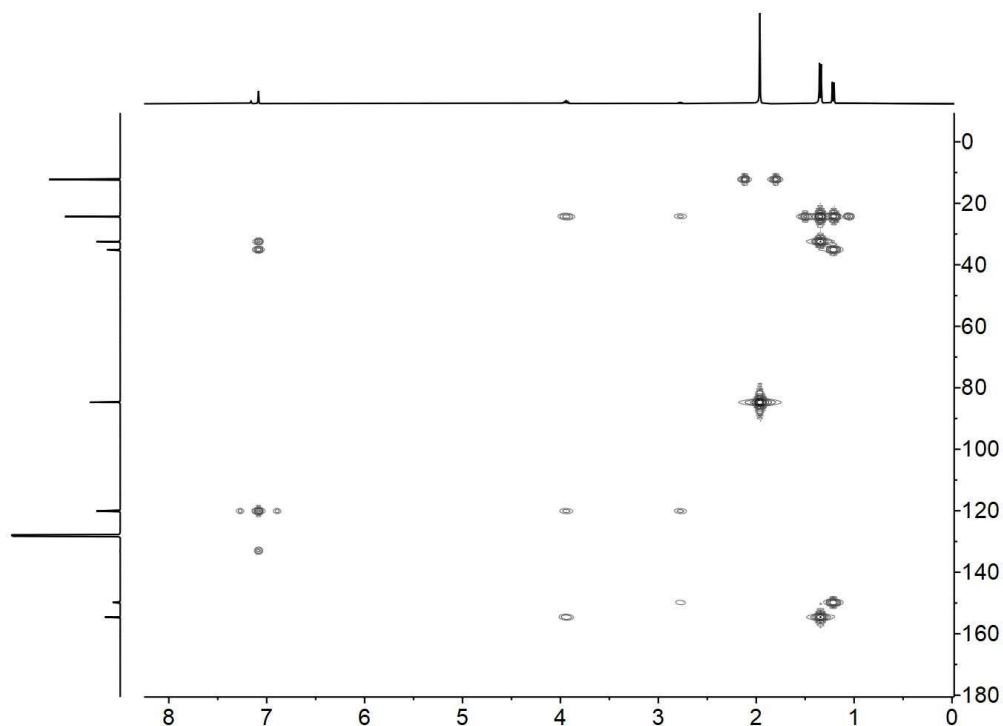

**Figure S11.**  $^1\text{H}$ - $^{13}\text{C}$  GHMBC (400 MHz/101 MHz, 298 K,  $\text{C}_6\text{D}_6$ ) spectrum of compound **3b**.

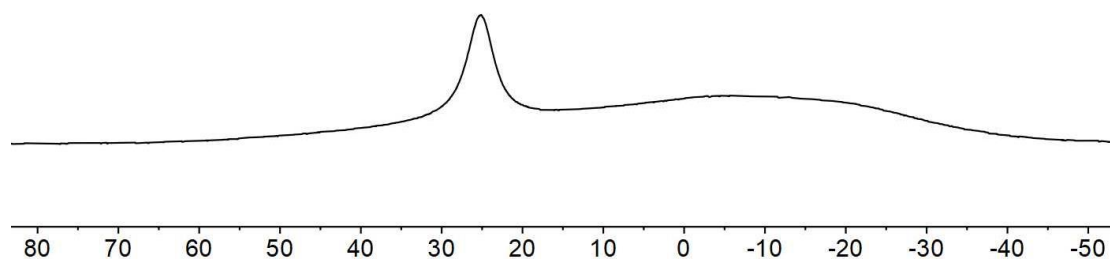

**Figure S12.**  $^{11}\text{B}$  NMR (128 MHz, 298 K,  $\text{C}_6\text{D}_6$ ) spectrum of compound **3b**.

**X-ray crystal structure analysis of compound 3b:** formula  $\text{C}_{25}\text{H}_{41}\text{BRu}$ ,  $M = 453.46$  g/mol, yellow crystal,  $0.25 \times 0.2 \times 0.1$  mm,  $a = 9.2828(4)$ ,  $b = 14.0011(6)$ ,  $c = 9.3396(4)$  Å,  $\alpha = 90$ ,  $\beta = 97.9350(10)$ ,  $\gamma = 90^\circ$ ,  $V = 1202.24(9)$  Å<sup>3</sup>,  $\rho_{\text{calc}} = 1.253$  g·cm<sup>-3</sup>,  $\mu = 0.659$  mm<sup>-1</sup>, empirical absorption correction ( $0.6624 \leq T \leq 0.7456$ ),  $Z = 2$ , monoclinic, space group  $P2_1$  (No. 4),  $\lambda = 0.71073$  Å,  $T = 170$  K,  $\omega$  and  $\varphi$  scans, 5807 reflections collected

( $\pm h$ ,  $\pm k$ ,  $\pm l$ ), 3533 independent ( $R_{\text{int}} = 0.0635$ ) and 3185 observed reflections [ $I > 2\sigma(I)$ ], 407 refined parameters,  $R = 0.0328$ ,  $wR^2 = 0.0867$ , max. (min.) residual electron density 0.31 (-0.66) e.Å<sup>-3</sup>.

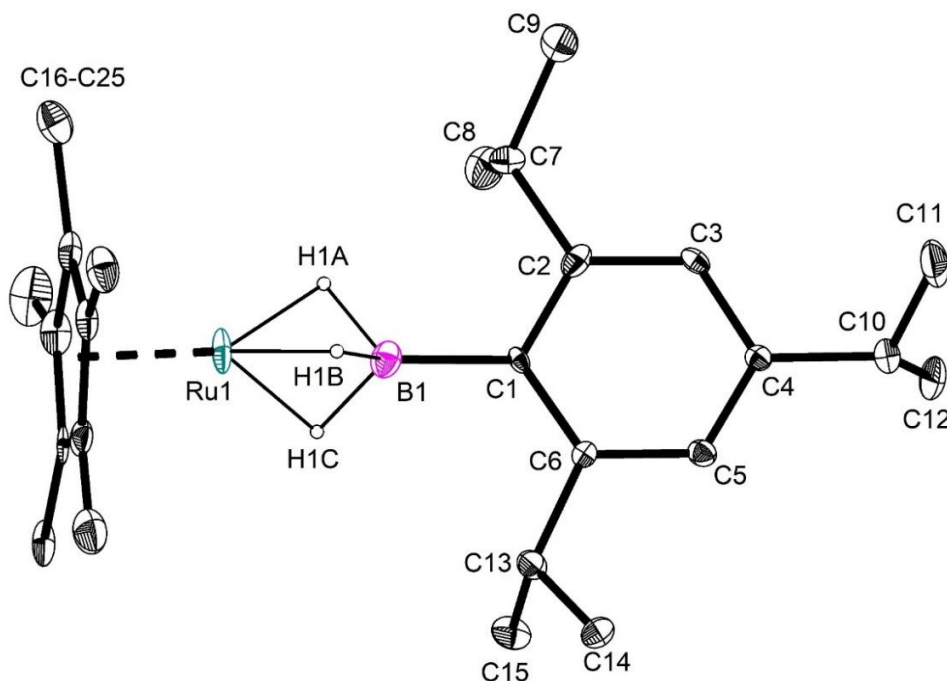

**Figure S13.** Molecular structure of compound **3b** (thermal ellipsoids are shown at the 30% probability level).

### NMR spectra and crystallographic data of compound **3c**

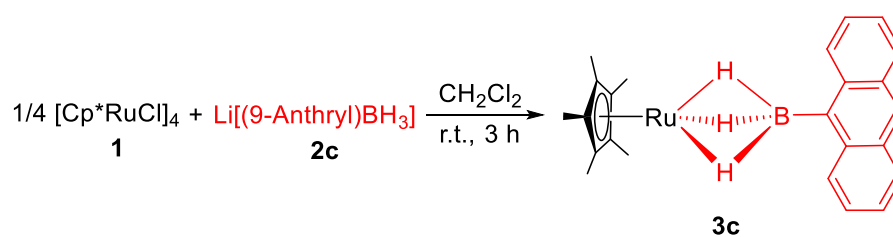

**Scheme S3**

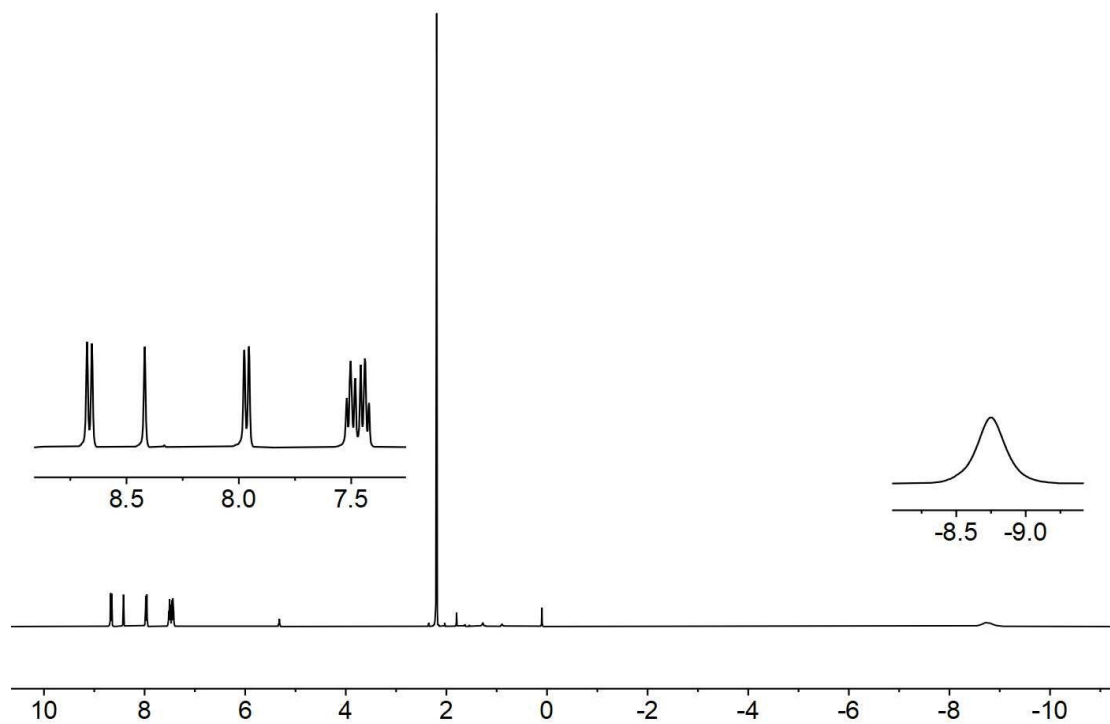

**Figure S14.**  $^1\text{H}$  NMR (400 MHz, 298 K,  $\text{CD}_2\text{Cl}_2$ ) spectrum of compound **3c**.

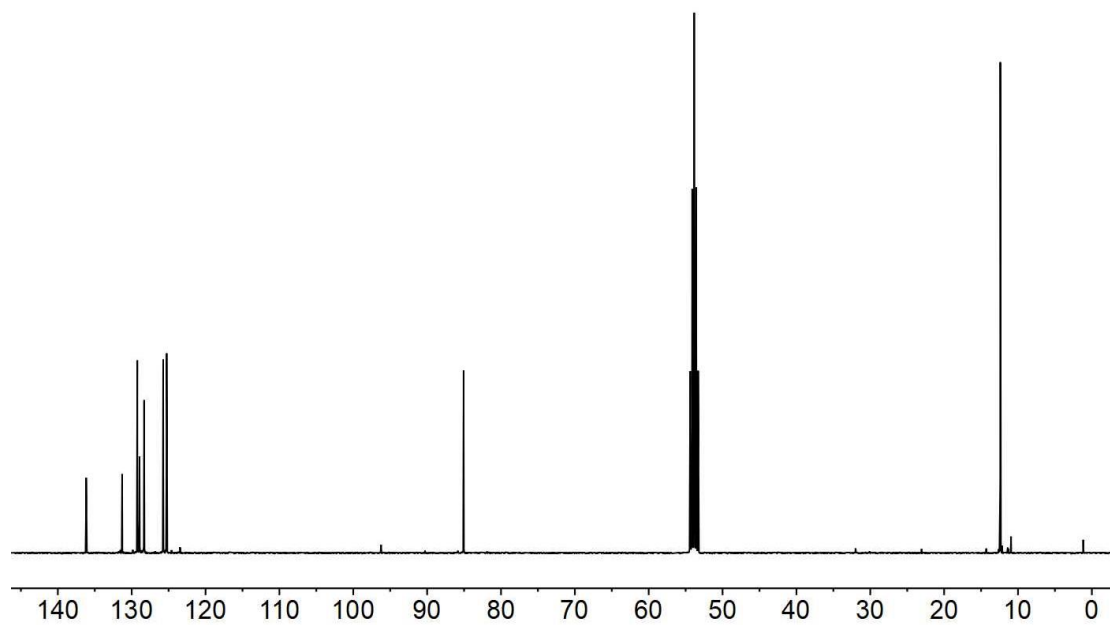

**Figure S15.**  $^{13}\text{C}\{^1\text{H}\}$  NMR (101 MHz, 298 K,  $\text{CD}_2\text{Cl}_2$ ) spectrum of compound **3c**.

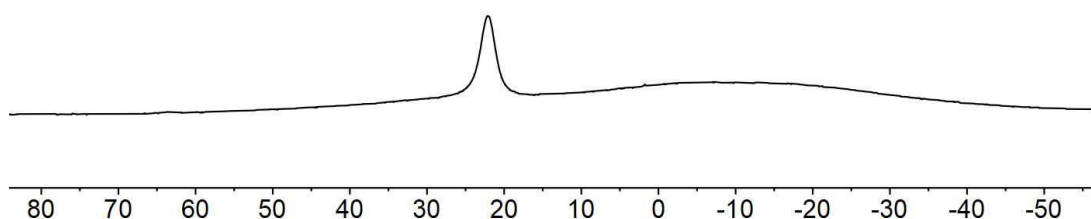

**Figure S16.**  $^{11}\text{B}$  NMR (128 MHz, 298 K,  $\text{CD}_2\text{Cl}_2$ ) spectrum of compound **3c**.

**X-ray crystal structure analysis of compound 3c:** formula  $\text{C}_{24}\text{H}_{27}\text{BRu}$ ,  $M = 427.33$  g/mol, yellow crystal,  $0.27 \times 0.15 \times 0.1$  mm,  $a = 11.932(3)$ ,  $b = 13.828(4)$ ,  $c = 14.862(4)$  Å,  $\alpha = 114.054(7)$ ,  $\beta = 99.367(7)$ ,  $\gamma = 104.778(8)^\circ$ ,  $V = 2064.0(10)$  Å<sup>3</sup>,  $\rho_{\text{calc}} = 1.375$  g·cm<sup>-3</sup>,  $\mu = 0.763$  mm<sup>-1</sup>, empirical absorption correction ( $0.6700 \leq T \leq 0.7457$ ),  $Z = 4$ , triclinic, space group  $P\bar{1}$  (No. 2),  $\lambda = 0.71073$  Å,  $T = 150$  K,  $\omega$  and  $\varphi$  scans, 53949 reflections collected ( $\pm h, \pm k, \pm l$ ), 10113 independent ( $R_{\text{int}} = 0.0657$ ) and 7500 observed reflections [ $I > 2\sigma(I)$ ], 599 refined parameters,  $R = 0.0363$ ,  $wR^2 = 0.0897$ , max. (min.) residual electron density 0.48 (-0.65) e·Å<sup>-3</sup>.

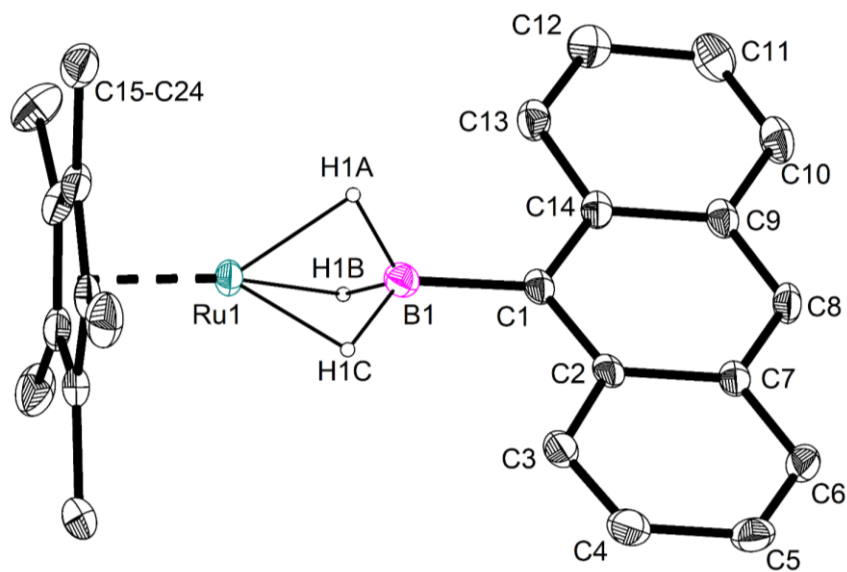

**Figure S17.** Molecular structure of compound **3c** (thermal ellipsoids are shown at the 30% probability level).

### Thermal stability tests of ruthenium tris( $\sigma$ -B-H) borates **3a-c**

**Table S1.** Thermal stability data of ruthenium tris( $\sigma$ -B-H) borates **3a-c** in solution

|           | Ar        | 50 °C | 110 °C | 130 °C | 150 °C |
|-----------|-----------|-------|--------|--------|--------|
| <b>3a</b> | Mes       | ●     | ●      | ◇      | ■      |
| <b>3b</b> | Tipp      | ●     | ●      | ●      | ◇      |
| <b>3c</b> | 9-Anthryl | ◇     | ■      | –      | –      |

All reactions were carried out for 10 h in toluene- $d_8$  under a nitrogen atmosphere. ● = Stable, ◇ = Partly decomposed, ■ = Completely decomposed.

## Reaction of **3a** with $D_2$

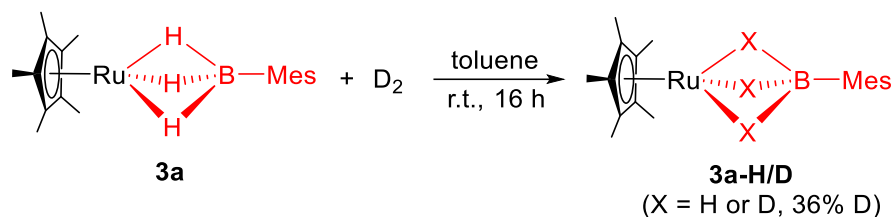

### Scheme S4

In a Schlenk tube (10 mL), compound **3a** (73.9 mg, 0.20 mmol) was dissolved in toluene (5 mL). The tube was evacuated under  $-78\text{ }^\circ\text{C}$ , and then refilled with  $D_2$  atmosphere (0.8 bar). After stirring for 16 h at room temperature, the solvent was removed under vacuum to give a yellow solid. The  $^1\text{H}$  NMR spectroscopy studies revealed a 36% decrease in the intensity of the hydride signal, which indicated that D-D/B-H oxidative addition and H/D exchange were occurred. Deuterium incorporation was also confirmed by the  $^2\text{H}$  NMR spectroscopy in toluene.

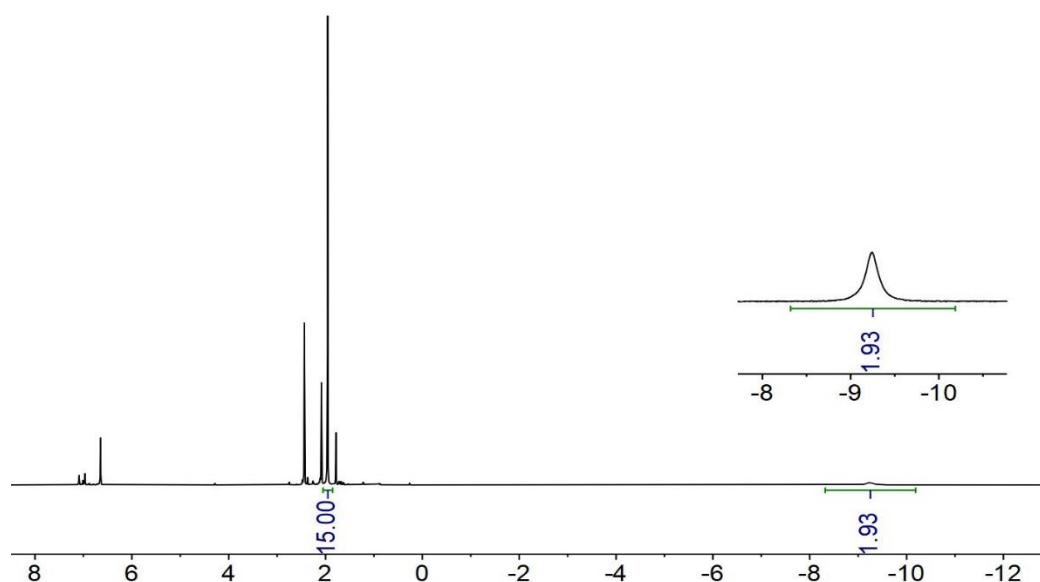

**Figure S18.**  $^1\text{H}$  NMR (400 MHz, 298 K, toluene- $d_8$ ) spectrum of compound **3a-H/D**.

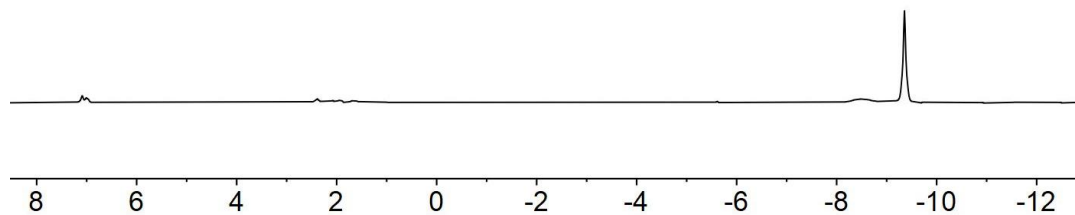

**Figure S19.**  $^2\text{H}$  NMR (77 MHz, 298 K, toluene) spectrum of compound **3a-H/D**.

### Reaction of **3a-D** with HBpin

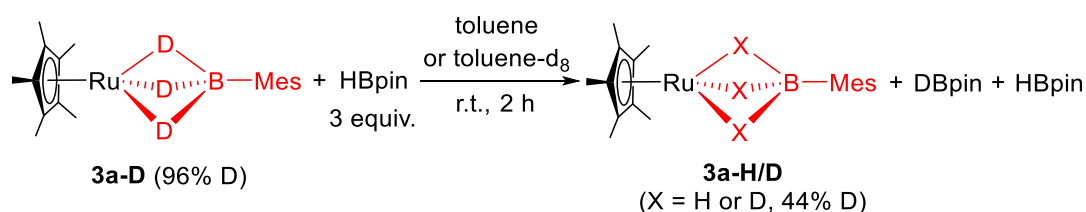

### Scheme S5

Following the same procedure of synthesis of compound **3a**, reaction of  $[\text{Cp}^*\text{RuCl}]_4$  and  $\text{Li}[\text{MesBD}_3]$  gave **3a-D** as a yellow crystalline solid, which was 96% deuterium as determined by  $^1\text{H}$  NMR. In an NMR tube, compound **3a-D** (11.2 mg, 0.03 mmol) and HBpin (11.5 mg, 0.09 mmol) were dissolved in toluene- $\text{d}_8$  (0.6 mL). After 2 h at room temperature, NMR experiments were conducted.  $^1\text{H}$  NMR spectroscopy studies revealed there was only 44% deuterium according to the integration of the hydride signal, indicating that B-H/B-D oxidative addition and H/D exchange were occurred. Additionally, the concomitant formation of DBpin via the H/D exchange process was judged by  $^{11}\text{B}$  NMR, which was also confirmed by



$^2\text{H}$  NMR spectroscopy of the same reaction in toluene.

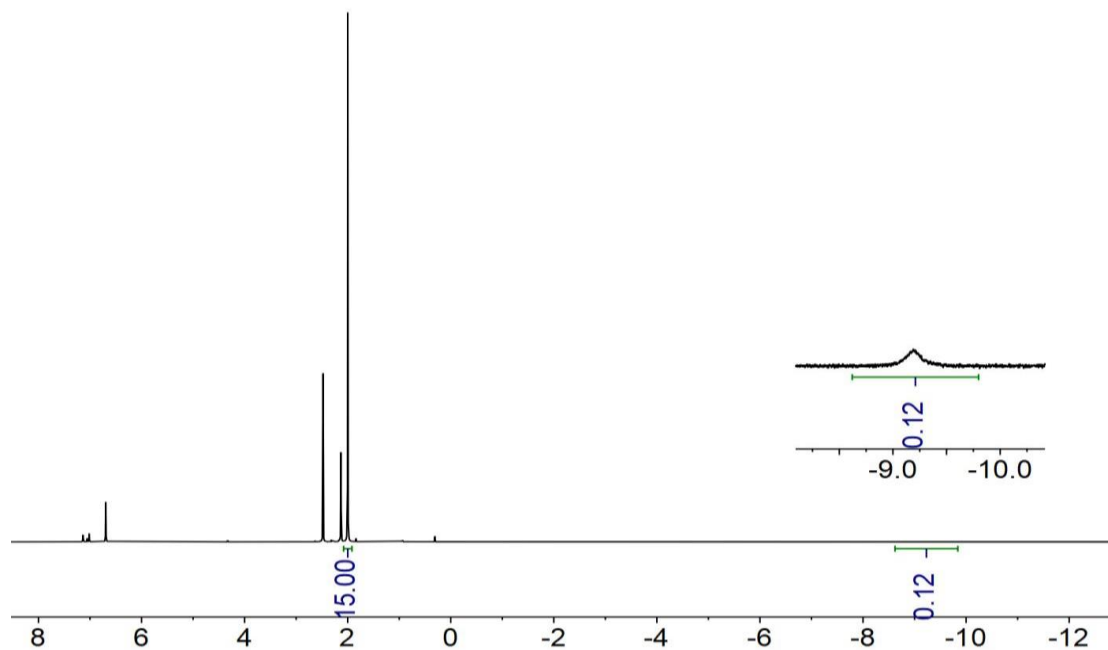

**Figure S20.**  $^1\text{H}$  NMR (400 MHz, 298 K, toluene- $\text{d}_8$ ) spectrum of compound **3a-D**.

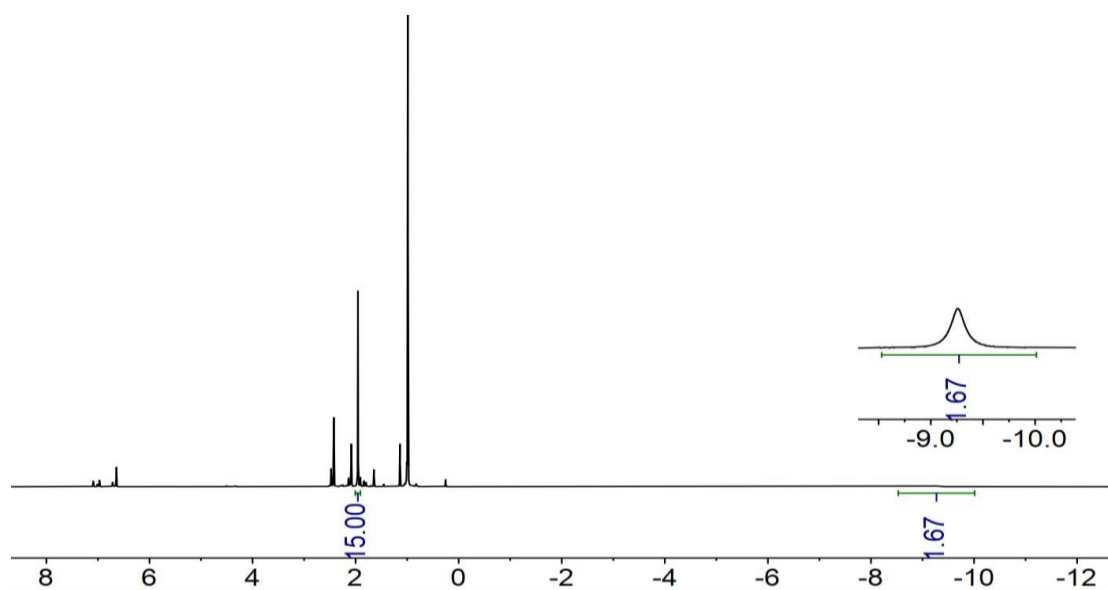

**Figure S21.**  $^1\text{H}$  NMR (400 MHz, 298 K, toluene- $\text{d}_8$ ) spectrum of the reaction between compound **3a-D** and HBpin.

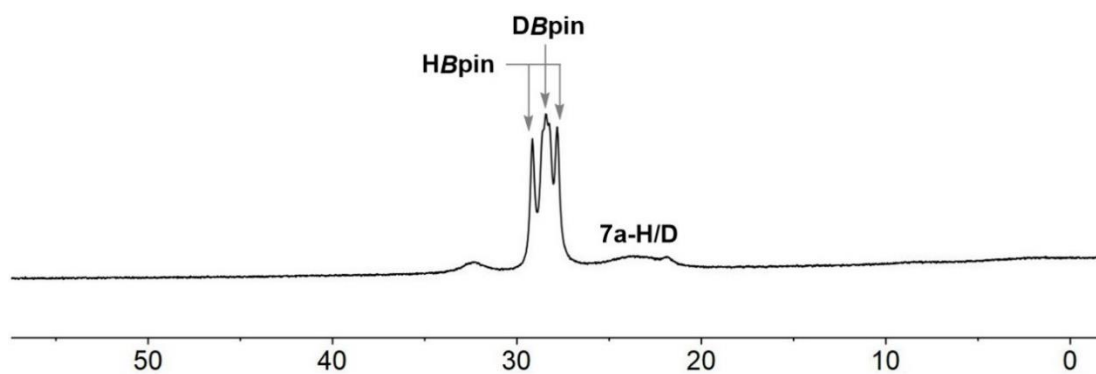

**Figure S22.**  $^{11}\text{B}$  NMR (128 MHz, 298 K, toluene- $d_8$ ) spectrum of the reaction between compound **3a-D** and HBpin.

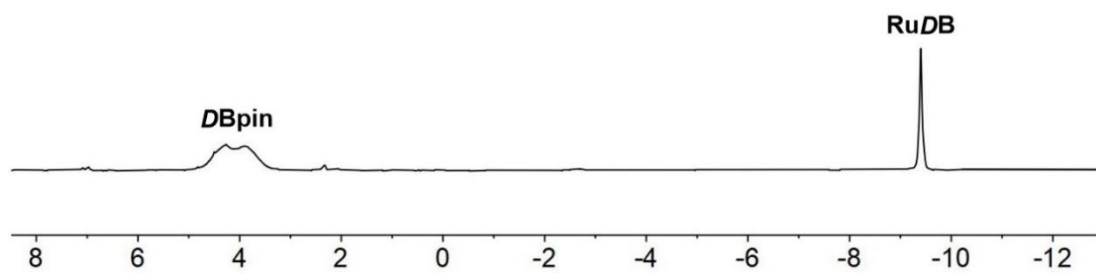

**Figure S23.**  $^2\text{H}$  NMR (77 MHz, 298 K, toluene) spectrum of the reaction between compound **3a-D** and HBpin.

### NMR spectra and crystallographic data of compound **4a**

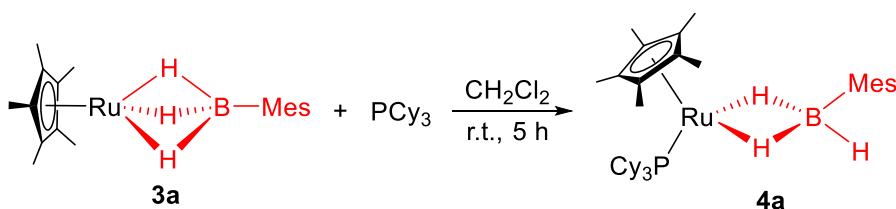

**Scheme S6**

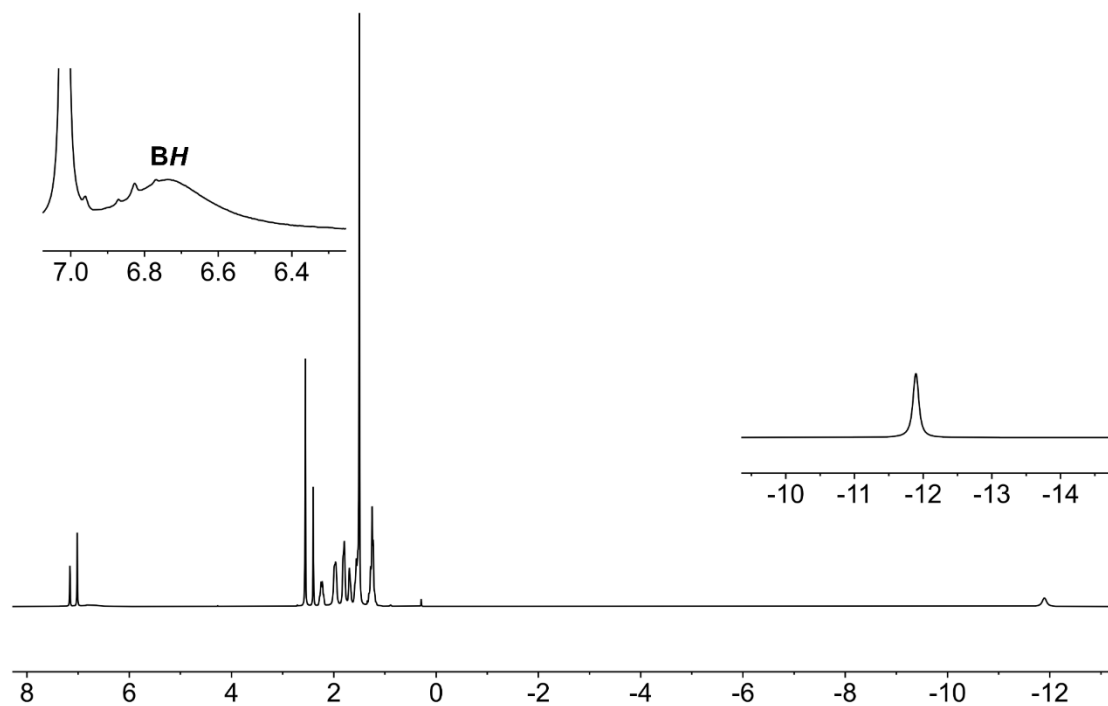

**Figure S24.**  $^1\text{H}$  NMR (400 MHz, 298 K,  $\text{C}_6\text{D}_6$ ) spectrum of **4a**.

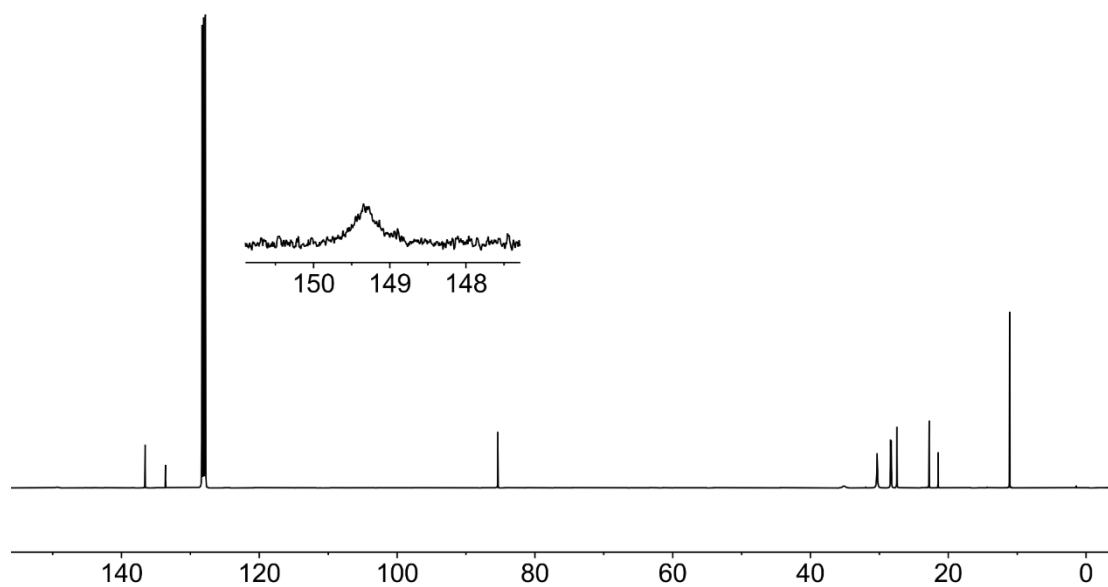

**Figure S25.**  $^{13}\text{C}\{^1\text{H}\}$  NMR (101 MHz, 298 K,  $\text{C}_6\text{D}_6$ ) spectrum of **4a**.

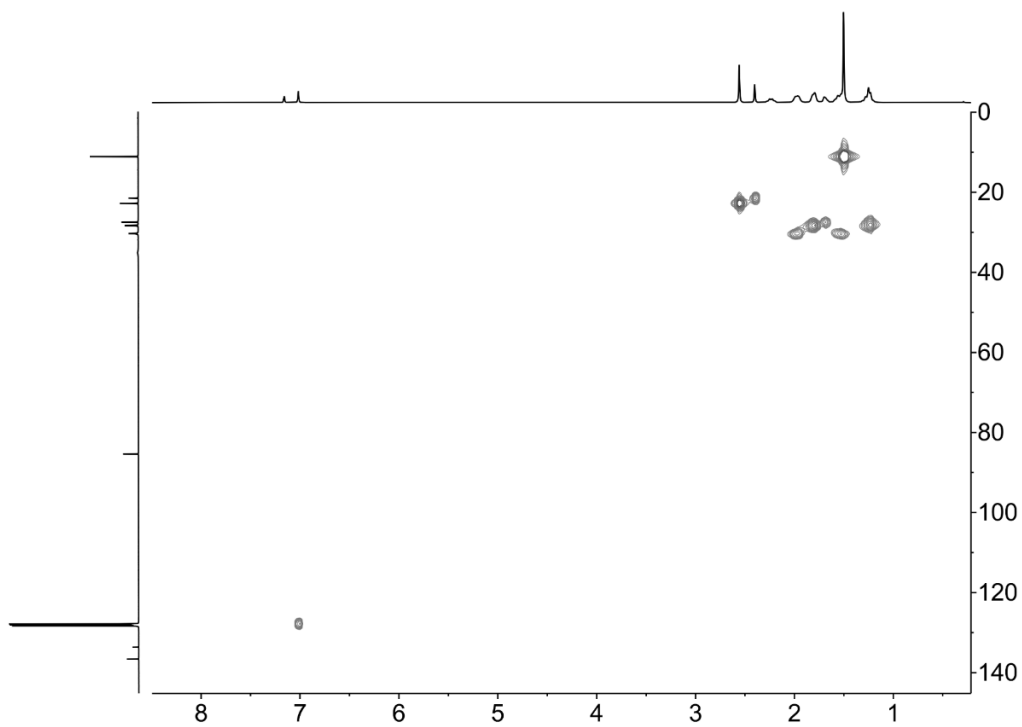

**Figure S26.**  $^1\text{H}$ - $^{13}\text{C}$  GHSQC (400 MHz/101 MHz, 298 K,  $\text{C}_6\text{D}_6$ ) spectrum of **4a**.

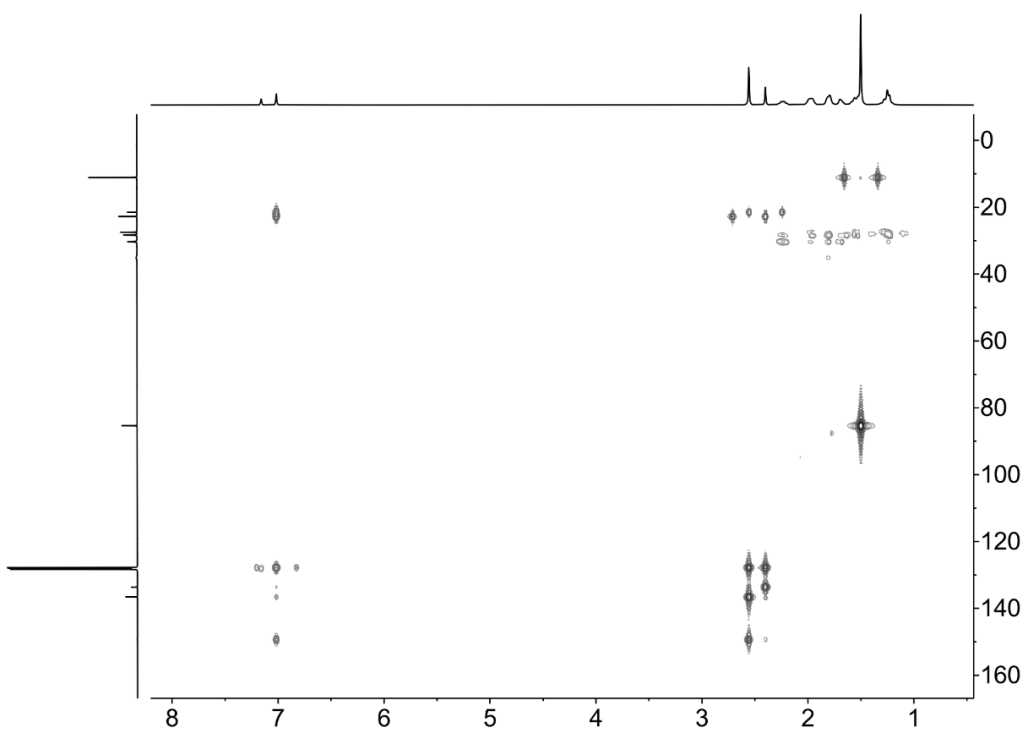

**Figure S27.**  $^1\text{H}$ - $^{13}\text{C}$  GHMBC (400 MHz/101 MHz, 298 K,  $\text{C}_6\text{D}_6$ ) spectrum of **4a**.

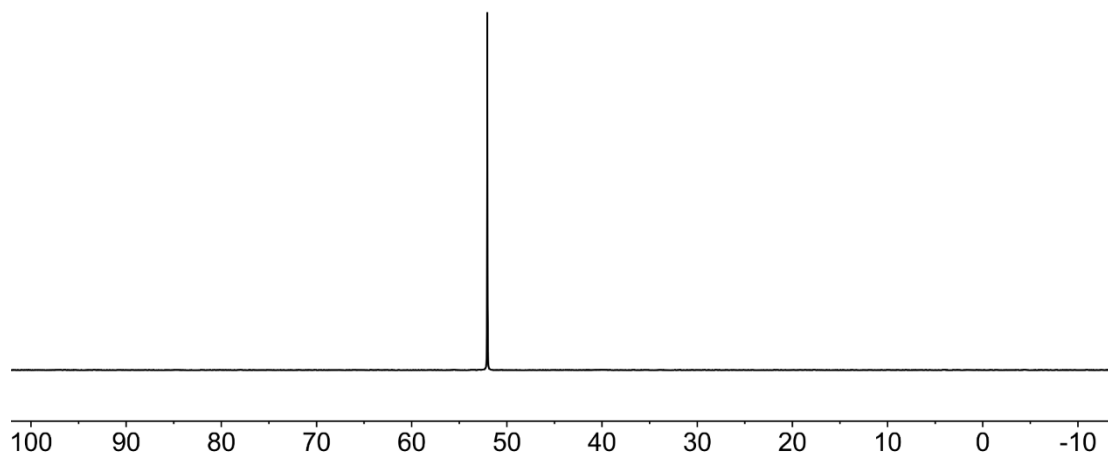

**Figure S28.**  $^{31}\text{P}\{^1\text{H}\}$  NMR (162 MHz, 298 K,  $\text{C}_6\text{D}_6$ ) spectrum of **4a**.

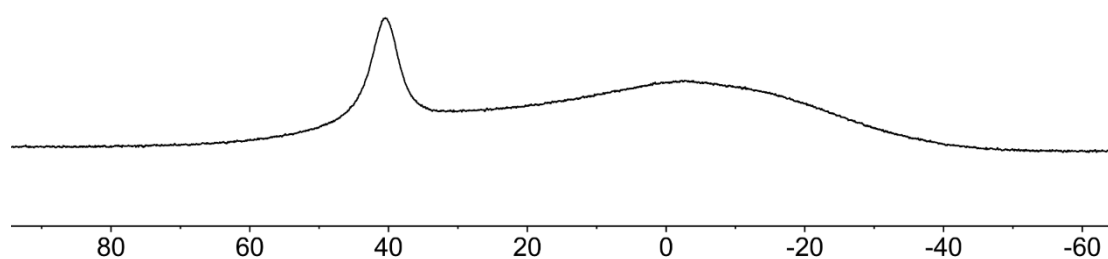

**Figure S29.**  $^{11}\text{B}$  NMR (128 MHz, 298 K,  $\text{C}_6\text{D}_6$ ) spectrum of **4a**.

**X-ray crystal structure analysis of compound 4a:** formula  $\text{C}_{37}\text{H}_{62}\text{BPRu}$ ,  $M = 649.71$ , red crystal,  $0.38 \times 0.26 \times 0.18$  mm,  $a = 10.0172(2)$ ,  $b = 12.1842(2)$ ,  $c = 16.9434(3)$  Å,  $\alpha = 65.7160(10)$ ,  $\beta = 81.0310(10)$ ,  $\gamma = 64.7590(10)^\circ$ ,  $V = 1704.54(6)$  Å<sup>3</sup>,  $\rho_{\text{calc}} = 1.266$  g·cm<sup>-3</sup>,  $\mu = 0.530$  mm<sup>-1</sup>, empirical absorption correction ( $0.6758 \leq T \leq 0.7456$ ),  $Z = 2$ , triclinic, space group  $P\bar{1}$  (No. 2),  $\lambda = 0.71073$  Å,  $T = 173$  K,  $\omega$  and  $\varphi$  scans, 8260 reflections collected ( $\pm h$ ,  $\pm k$ ,  $\pm l$ ), 5799 independent ( $R_{\text{int}} = 0.0145$ ) and 5378 observed reflections [ $I > 2\sigma(I)$ ], 381 refined parameters,  $R = 0.0243$ ,  $wR^2 = 0.0610$ , max. (min.) residual electron density  $0.59$  ( $-0.55$ ) e·Å<sup>-3</sup>.

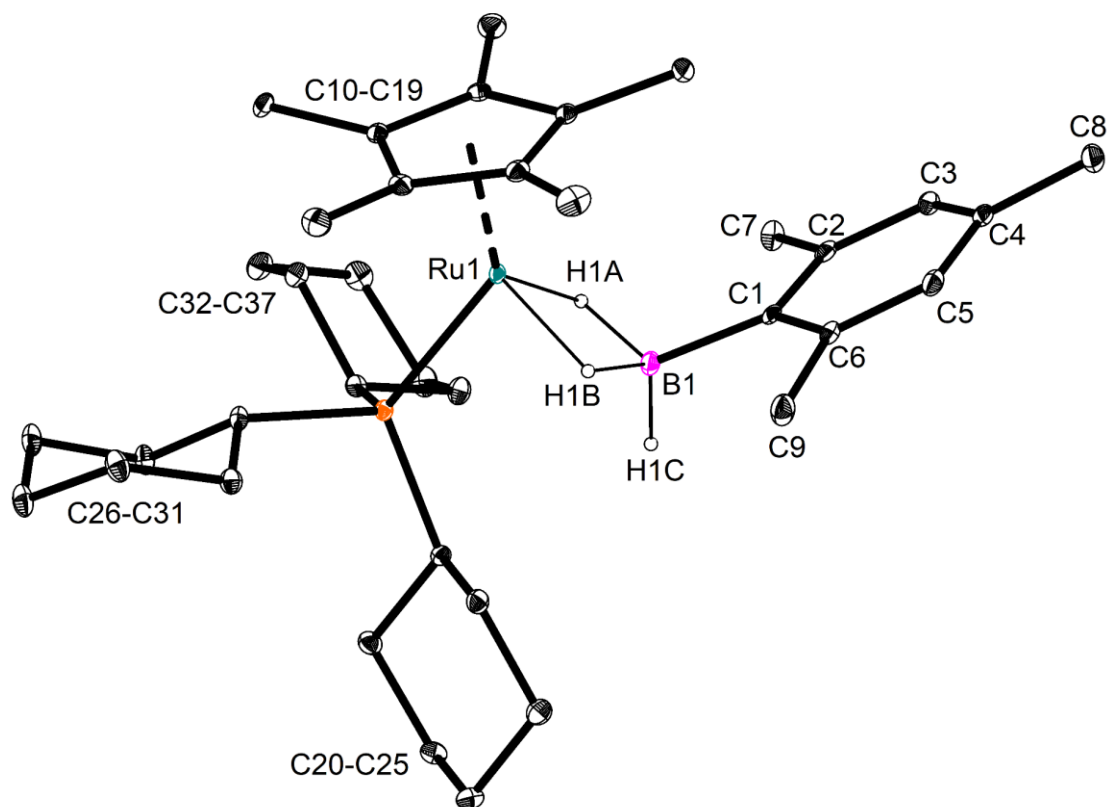

**Figure S30.** Molecular structure of **4a** (thermal ellipsoids are shown at the 30% probability level).

### NMR spectra and crystallographic data of compound **4b**

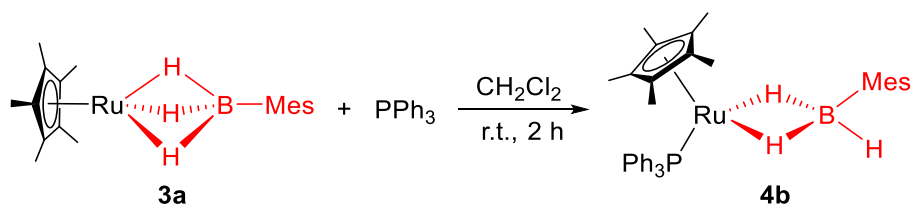

**Scheme S7**

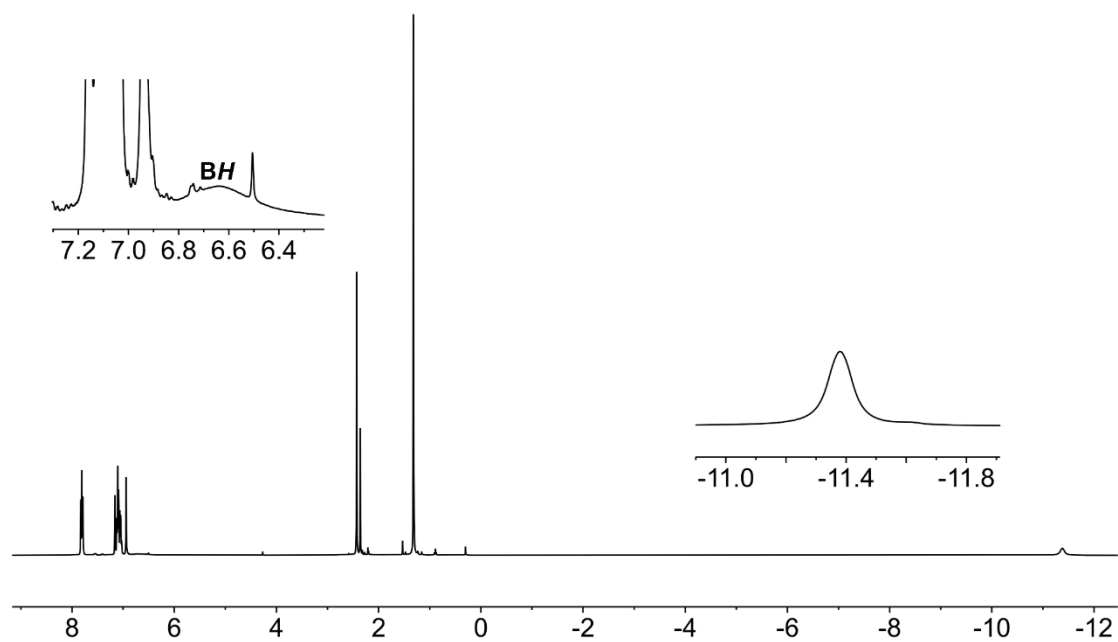

**Figure S31.**  $^1\text{H}$  NMR (400 MHz, 298 K,  $\text{C}_6\text{D}_6$ ) spectrum of **4b**.

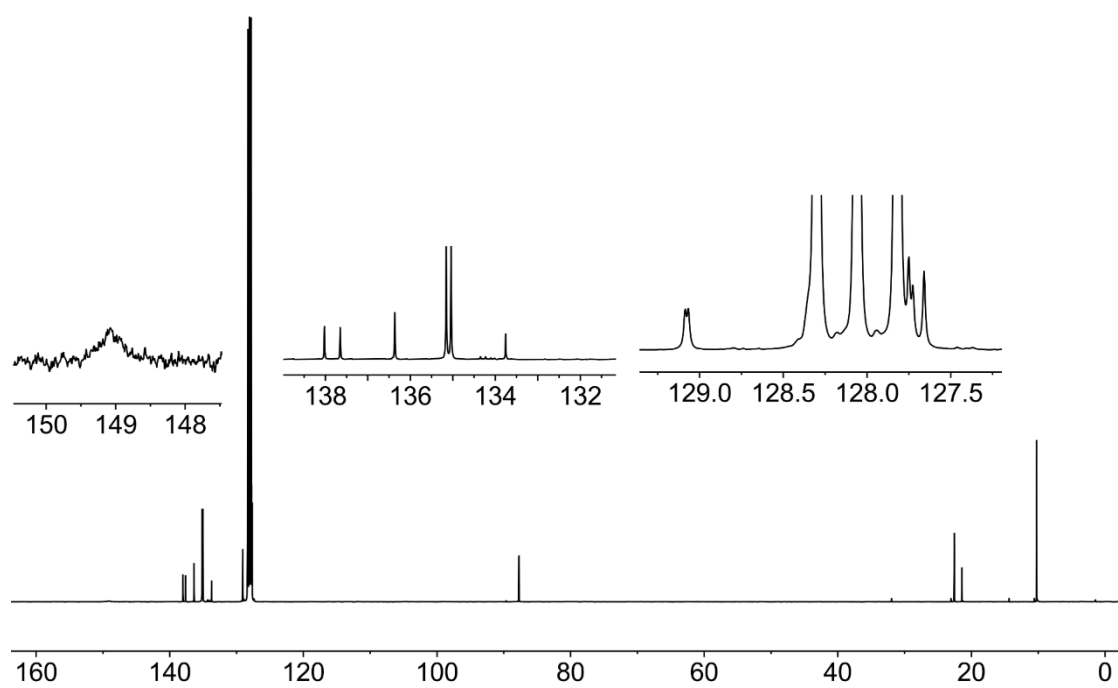

**Figure S32.**  $^{13}\text{C}\{^1\text{H}\}$  NMR (101 MHz, 298 K,  $\text{C}_6\text{D}_6$ ) spectrum of **4b**.

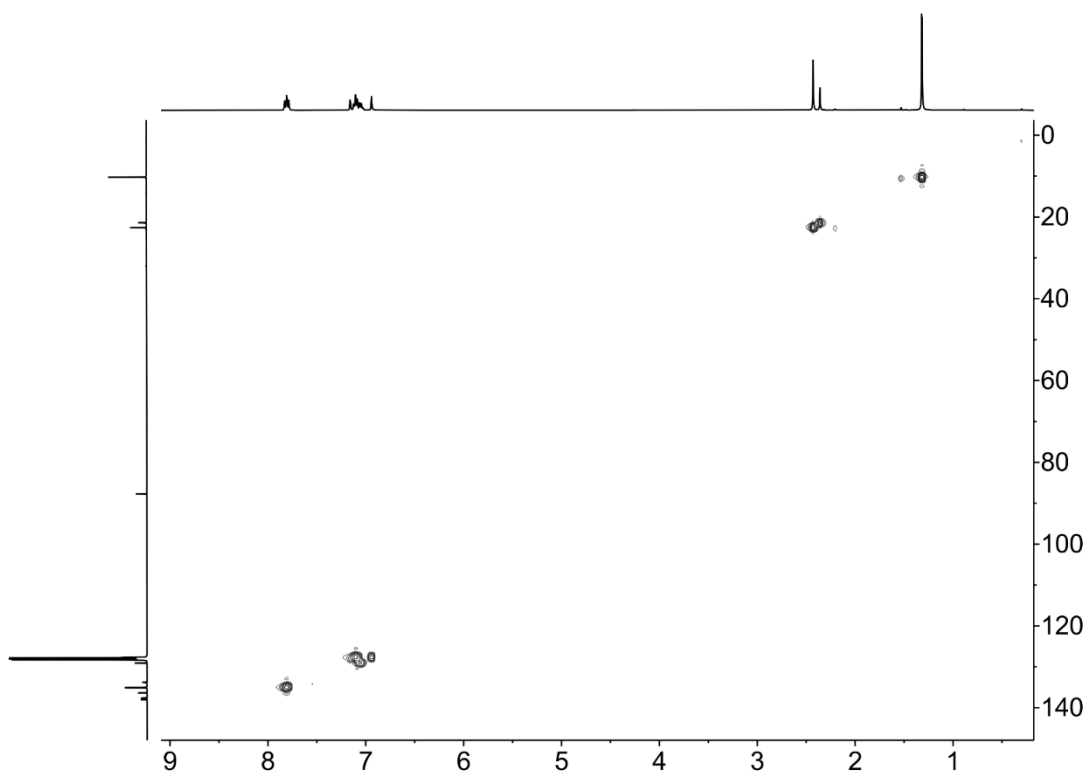

**Figure S33.**  $^1\text{H}$ - $^{13}\text{C}$  GHSQC (400 MHz/101 MHz, 298 K,  $\text{C}_6\text{D}_6$ ) spectrum of **4b**.

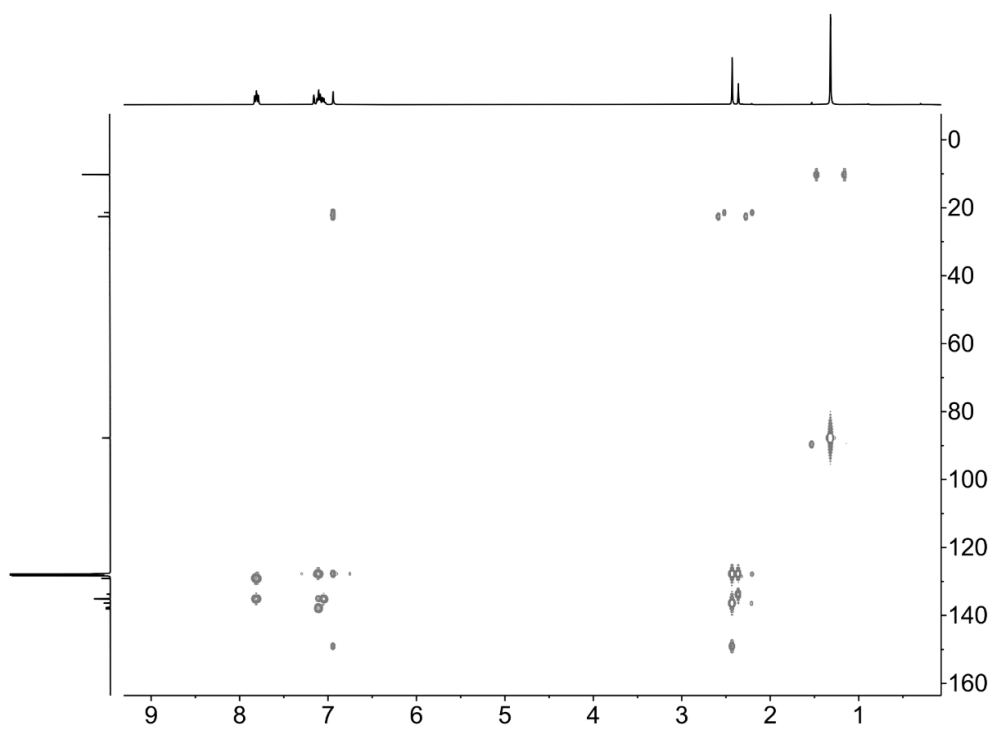

**Figure S34.**  $^1\text{H}$ - $^{13}\text{C}$  GHMBC (400 MHz/101 MHz, 298 K,  $\text{C}_6\text{D}_6$ ) spectrum of **4b**.



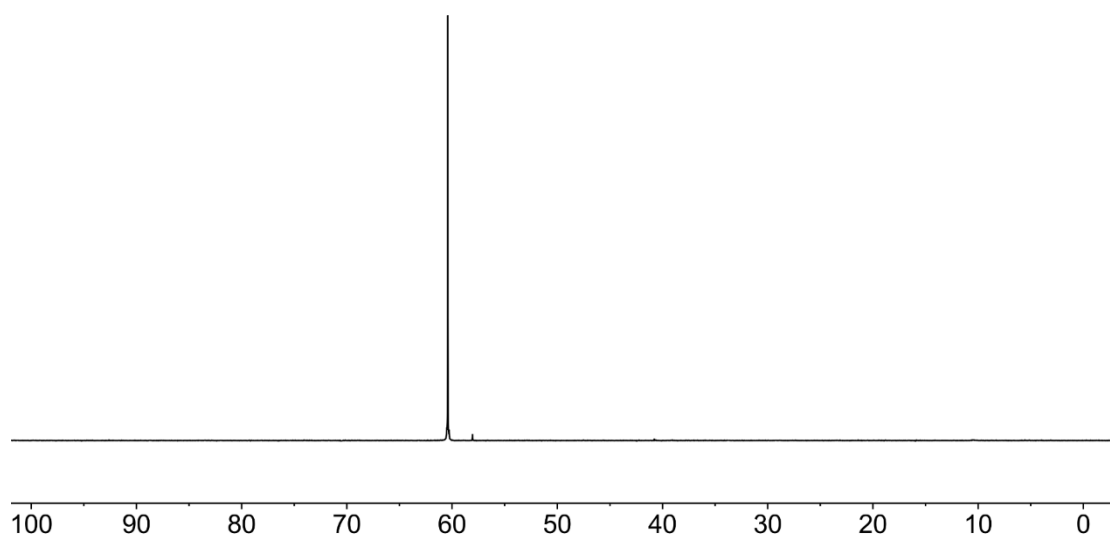

**Figure S35.**  $^{31}\text{P}\{^1\text{H}\}$  NMR (162 MHz, 298 K,  $\text{C}_6\text{D}_6$ ) spectrum of **4b**.

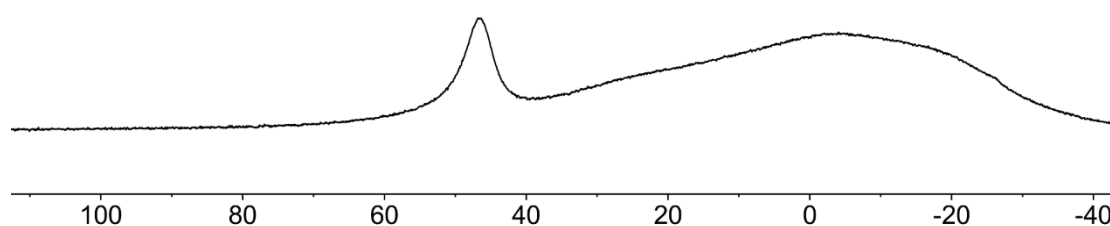

**Figure S36.**  $^{11}\text{B}$  NMR (128 MHz, 298 K,  $\text{C}_6\text{D}_6$ ) spectrum of **4b**.

**X-ray crystal structure analysis of compound 4b:** formula  $\text{C}_{37}\text{H}_{44}\text{BPRu}$ ,  $M = 631.57$ , yellow crystal,  $0.27 \times 0.24 \times 0.2$  mm,  $a = 9.61760(10)$ ,  $b = 10.06670$ ,  $c = 17.7082(2)$  Å,  $\alpha = 85.50$ ,  $\beta = 88.45$ ,  $\gamma = 69.31^\circ$ ,  $V = 1598.95(3)$  Å<sup>3</sup>,  $\rho_{\text{calc}} = 1.312$  g·cm<sup>-3</sup>,  $\mu = 0.564$  mm<sup>-1</sup>, empirical absorption correction ( $0.6672 \leq T \leq 0.7465$ ),  $Z = 2$ , triclinic, space group  $P\bar{1}$  (No. 2),  $\lambda = 0.71073$  Å,  $T = 173$  K,  $\omega$  and  $\phi$  scans, 15972 reflections collected ( $\pm h, \pm k, \pm l$ ), 9529 independent ( $R_{\text{int}} = 0.0143$ ) and 8868 observed reflections [ $I > 2\sigma(I)$ ], 381 refined parameters,  $R = 0.0238$ ,  $wR^2 = 0.0609$ , max. (min.) residual electron density 0.68 (-0.86) e·Å<sup>-3</sup>.

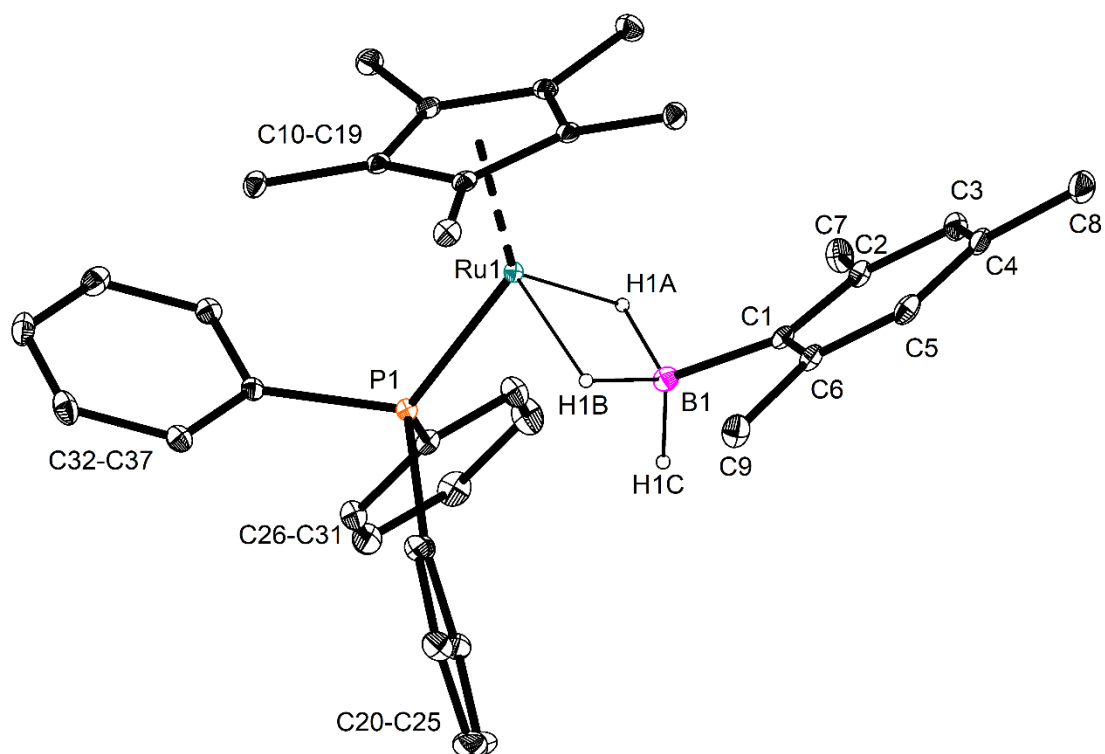

**Figure S37.** Molecular structure of **4b** (thermal ellipsoids are shown at the 30% probability level).

### NMR spectra and crystallographic data of compound **4c**

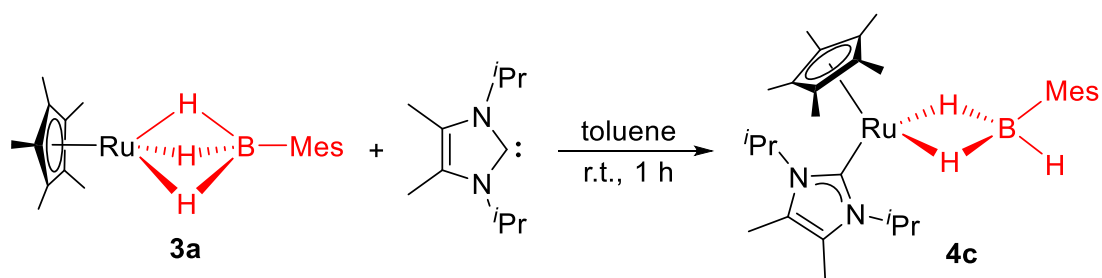

**Scheme S8**

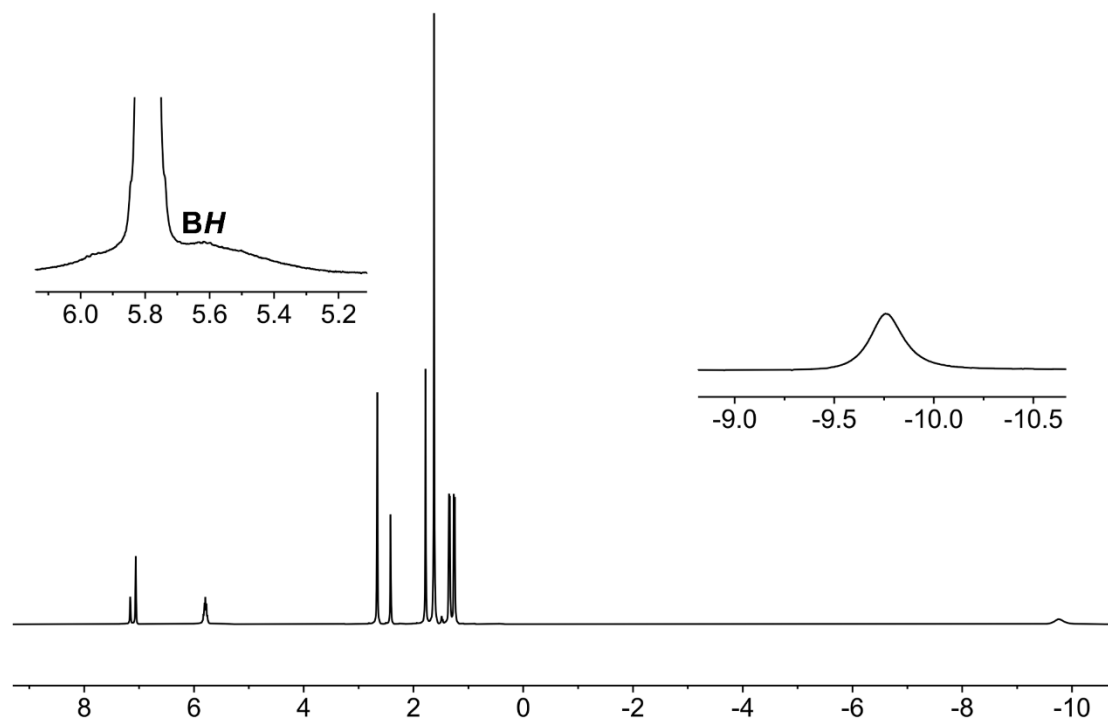

**Figure S38.**  $^1\text{H}$  NMR (400 MHz, 298 K,  $\text{C}_6\text{D}_6$ ) spectrum of **4c**.

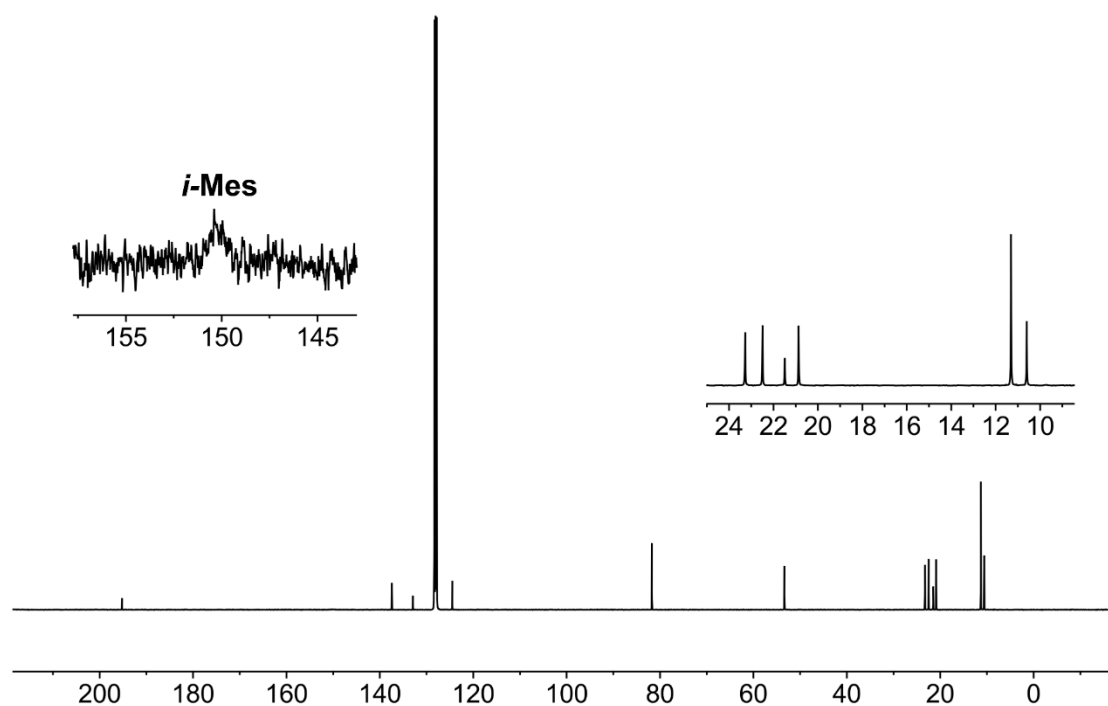

**Figure S39.**  $^{13}\text{C}\{^1\text{H}\}$  NMR (101 MHz, 298 K,  $\text{C}_6\text{D}_6$ ) spectrum of **4c**.

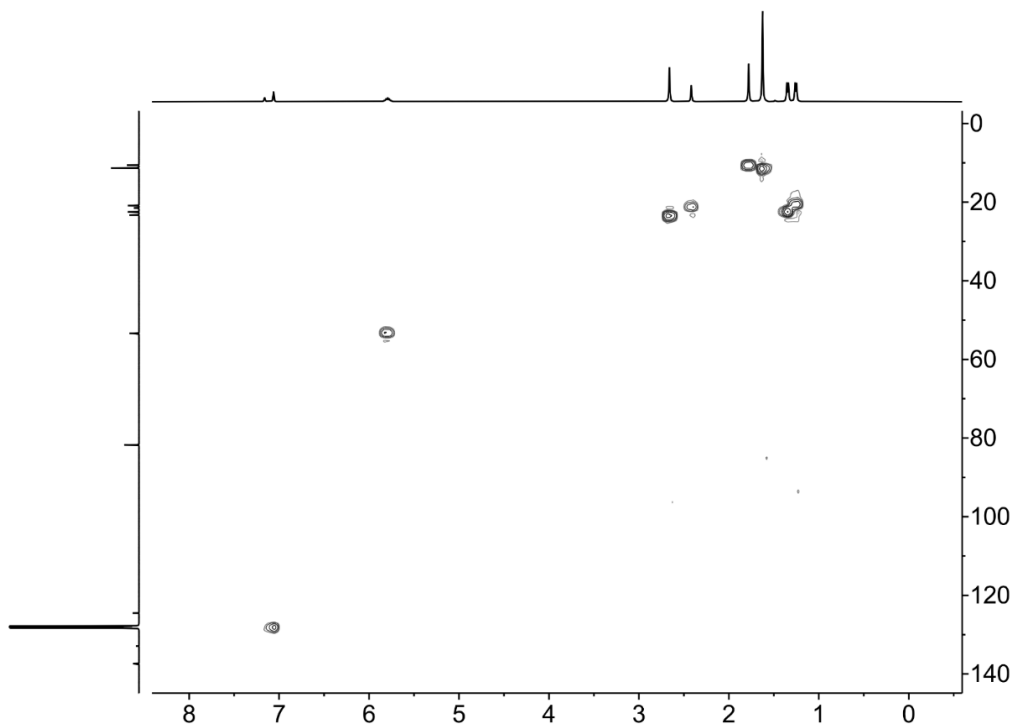

**Figure S40.**  $^1\text{H}$ - $^{13}\text{C}$  GHSQC (400 MHz/101 MHz, 298 K,  $\text{C}_6\text{D}_6$ ) spectrum of **4c**.

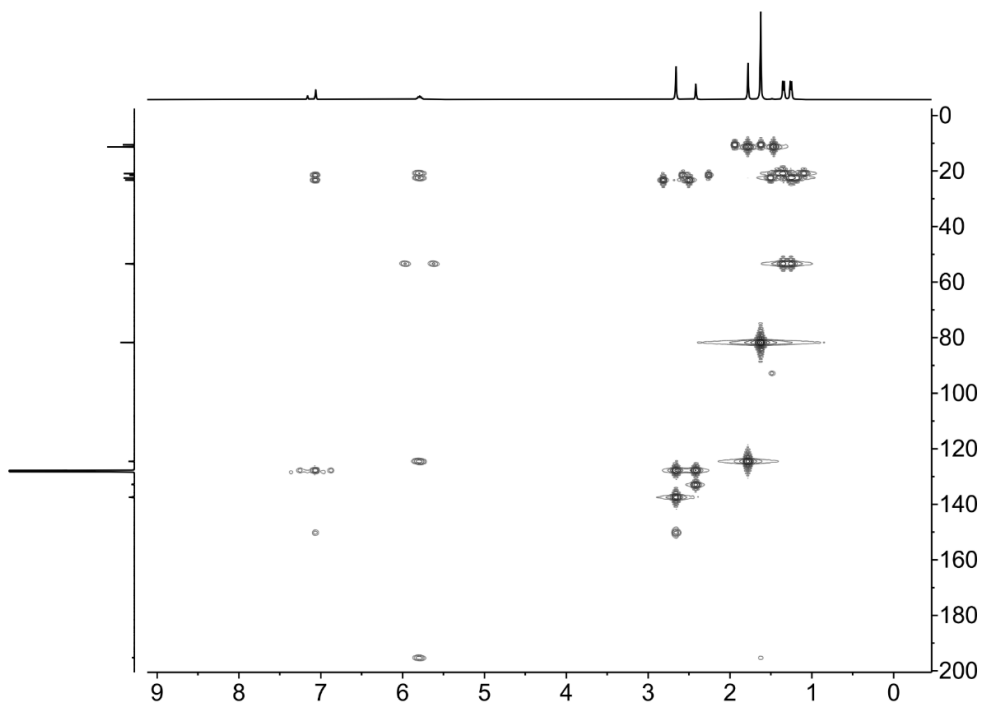

**Figure S41.**  $^1\text{H}$ - $^{13}\text{C}$  GHMBC (400 MHz/101 MHz, 298 K,  $\text{C}_6\text{D}_6$ ) spectrum of **4c**.

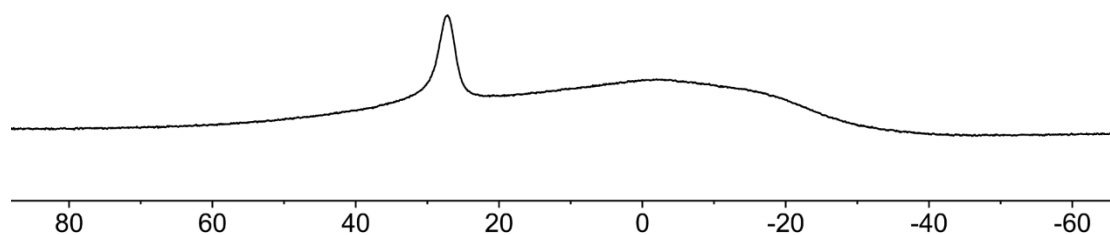

**Figure S42.**  $^{11}\text{B}$  NMR (128 MHz, 298 K,  $\text{C}_6\text{D}_6$ ) spectrum of **4c**.

**X-ray crystal structure analysis of compound 4c:** formula  $\text{C}_{30}\text{H}_{49}\text{BN}_2\text{Ru}$ ,  $M = 549.59$ , yellow crystal,  $0.42 \times 0.25 \times 0.12$  mm,  $a = 10.782(4)$ ,  $b = 12.152(4)$ ,  $c = 12.316(4)$  Å,  $\alpha = 112.688(8)$ ,  $\beta = 97.811(8)$ ,  $\gamma = 90.370(9)^\circ$ ,  $V = 1471.9(9)$  Å<sup>3</sup>,  $\rho_{\text{calc}} = 1.240$  g·cm<sup>-3</sup>,  $\mu = 0.552$  mm<sup>-1</sup>, empirical absorption correction ( $0.6855 \leq T \leq 0.7465$ ),  $Z = 2$ , triclinic, space group  $P\bar{1}$  (No. 2),  $\lambda = 0.71073$  Å,  $T = 120$  K,  $\omega$  and  $\varphi$  scans, 44116 reflections collected ( $\pm h$ ,  $\pm k$ ,  $\pm l$ ), 8964 independent ( $R_{\text{int}} = 0.0425$ ) and 8100 observed reflections [ $I > 2\sigma(I)$ ], 503 refined parameters,  $R = 0.0249$ ,  $wR^2 = 0.0606$ , max. (min.) residual electron density  $0.47$  ( $-0.72$ ) e·Å<sup>-3</sup>.

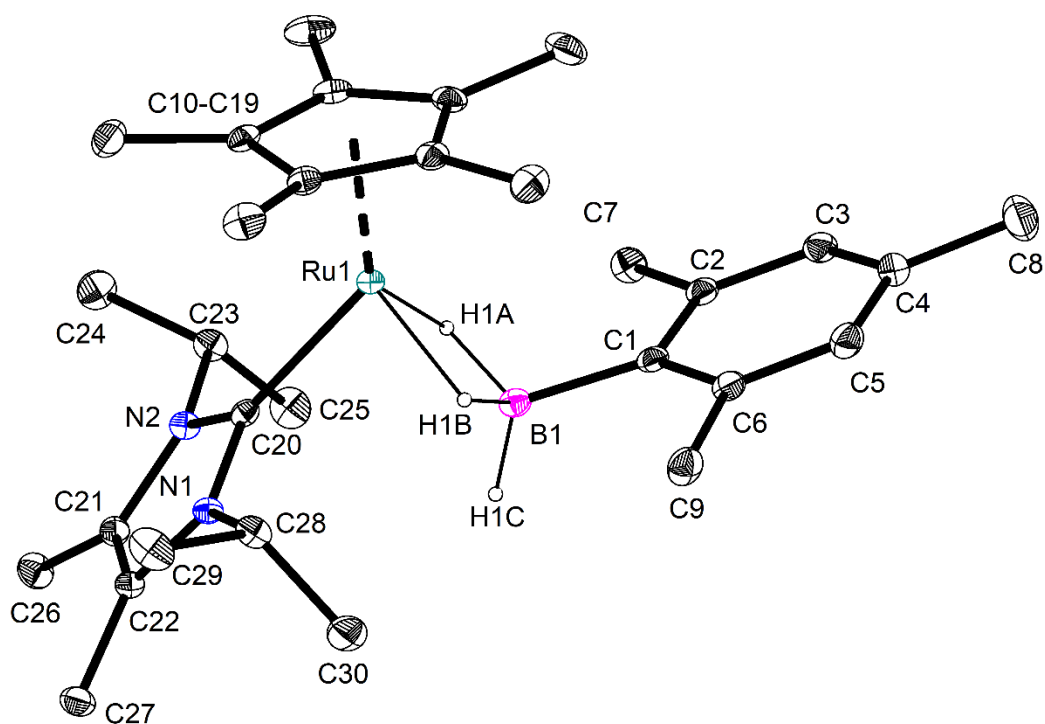

**Figure S43.** Molecular structure of **4c** (thermal ellipsoids are shown at the 30% probability level).

### Computational details

Geometry optimizations of **3a-c** were performed at the BP86<sup>1,2</sup>/def2-TZVPP<sup>3</sup> level, in combination with RI<sup>4</sup> and the def2/J auxiliary basis set<sup>5</sup> planted in the ORCA4.2.1 suite of programs.<sup>6,7</sup> During the calculations, the D3 dispersion correction suggested by Grimme et al<sup>8,9</sup> was used to accelerate the calculation. All species were characterized as local minima by analytic frequency calculations. The natural population analysis (NPA) have been performed using the natural bond orbital (NBO) analysis. The topology of the electron density was conducted through the Multiwfn program package.<sup>10</sup> [(1) A. D. Becke, *Phys. Rev. A*, 1988, **38**, 3098-3100.

(2) J. P. Perdew, *Phys. Rev. B*, 1986, **33**, 8822-8824. (3) F. Weigend and R. Ahlrichs, *Phys. Chem. Chem. Phys.*, 2005, **7**, 3297-3305. (4) K. Eichkorn, O. Treutler, H. Öhm, M. Häser and R. Ahlrichs, *Chem. Phys. Lett.*, 1995, **242**, 652-660. (5) F. Weigend, *Phys. Chem. Chem. Phys.*, 2006, **8**, 1057-1065. (6) F. Neese, *WIREs. Comput. Mol. Sci.*, 2012, **2**, 73-78. (7) F. Neese, *WIREs. Comput. Mol. Sci.*, 2018, **8**, e1327; (8) S. Grimme, J. Antony, S. Ehrlich and H. Krieg, *J. Chem. Phys.*, 2010, **132**, 154104; (9) S. Grimme, S. Ehrlich and L. Goerigk, *J. Comput. Chem.*, 2011, **32**, 1456-1465. (10) T. Lu and F. W. Chen, *J. Comput. Chem.*, 2012, **33**, 580-592. (11) I. Mayer, *Chem. Phys. Lett.*, 1983, **97**, 270-274.]

**Table S2** Calculated important geometrical parameters such as Ru-H, B-H and Ru-B bond lengths (in Å) and their corresponding average Mayer bond orders (MBO)<sup>11</sup> for the complexes **3a-c**. (Experimental values are given in parenthesis)

| Molecules | bond | length | MBO   | bond | length           | MBO   | bond | length | MBO   |
|-----------|------|--------|-------|------|------------------|-------|------|--------|-------|
| <b>3a</b> | Ru-H | 1.767  | 0.441 |      |                  |       | B-1H | 1.358  | 0.564 |
|           | Ru-H | 1.758  | 0.475 | Ru-B | 1.945<br>(1.958) | 0.625 | B-2H | 1.371  | 0.525 |
|           | Ru-H | 1.753  | 0.464 |      |                  |       | B-3H | 1.383  | 0.552 |
| <b>3b</b> | Ru-H | 1.764  | 0.395 |      |                  |       | B-1H | 1.358  | 0.599 |
|           | Ru-H | 1.752  | 0.46  | Ru-B | 1.944<br>(1.958) | 0.621 | B-2H | 1.379  | 0.526 |
|           | Ru-H | 1.745  | 0.439 |      |                  |       | B-3H | 1.381  | 0.526 |
| <b>3c</b> | Ru-H | 1.759  | 0.461 |      |                  |       | B-1H | 1.375  | 0.543 |
|           | Ru-H | 1.771  | 0.399 | Ru-B | 1.946<br>(1.961) | 0.668 | B-2H | 1.353  | 0.601 |
|           | Ru-H | 1.754  | 0.435 |      |                  |       | B-3H | 1.378  | 0.551 |

**Table S3** Calculated Natural charges at boron ( $q_B$ ) and metal center ( $q_{Ru}$ ) for the complexes **3a-c**.

| Molecules | $q_B$  | $q_{Ru}$ |
|-----------|--------|----------|
| <b>3a</b> | -0.023 | -0.176   |
| <b>3b</b> | -0.03  | -0.182   |
| <b>3c</b> | -0.04  | -0.174   |

**Table S4** Topological parameters at the bond critical points of the B-H and Ru-B bonds of **3a-c**. (All values are in a.u.)

| Molecules | BCP  | $\rho(r)$ | $\nabla^2\rho(r)$ | H(r)   |
|-----------|------|-----------|-------------------|--------|
| <b>3a</b> | B-H  | 0.134     | -0.212            | -0.108 |
|           | B-H  | 0.129     | -0.184            | -0.095 |
|           | B-H  | 0.131     | -0.200            | -0.101 |
|           | Ru-B | 0.130     | 0.034             | -0.087 |
| <b>3b</b> | B-H  | 0.134     | -0.212            | -0.108 |
|           | B-H  | 0.130     | -0.188            | -0.097 |
|           | B-H  | 0.129     | -0.189            | -0.096 |
|           | Ru-B | 0.131     | 0.034             | -0.088 |
| <b>3c</b> | B-H  | 0.130     | -0.192            | -0.098 |
|           | B-H  | 0.134     | -0.216            | -0.111 |
|           | B-H  | 0.130     | -0.197            | -0.099 |
|           | Ru-B | 0.130     | 0.036             | -0.087 |



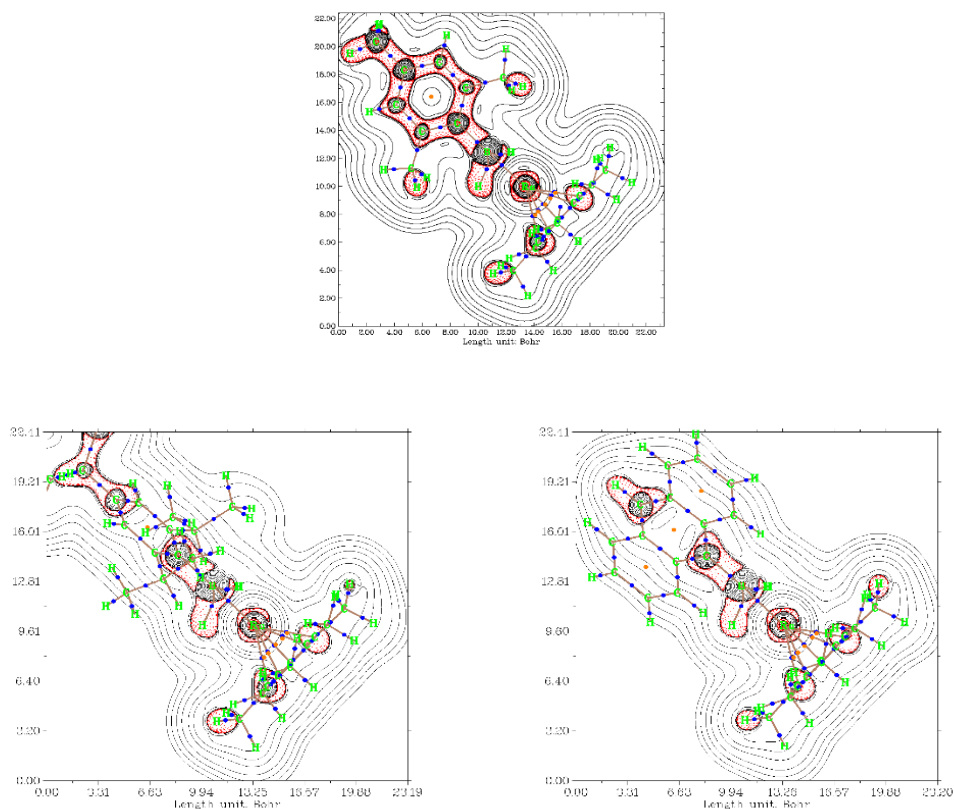

**Fig. S44** Contour line diagrams of the  $\nabla^2\rho(r)$  of **3a**(top), **3b** (left, bottom) and **3c** (right, bottom) in the plane of B-H-Ru. Dashed red lines indicate areas of charge concentration ( $\nabla^2\rho(r) < 0$ ), while solid black lines show areas of charge depletion ( $\nabla^2\rho(r) > 0$ ). Solid brown lines connecting the atomic nuclei are the bond paths. Blue and orange dots indicate BCPs and RCPs.

Cartesian coordinates for the calculated structure of **3a** (in Å).

|   |           |           |          |
|---|-----------|-----------|----------|
| C | -2.646502 | 8.776548  | 7.320186 |
| C | -2.342181 | 6.799071  | 5.925728 |
| C | -3.380382 | 7.241431  | 5.102660 |
| H | -3.663069 | 6.637711  | 4.236024 |
| C | -3.682552 | 9.185828  | 6.473686 |
| H | -4.204789 | 10.120914 | 6.690354 |
| C | -4.066854 | 8.434231  | 5.359418 |
| C | -2.277709 | 9.642187  | 8.500035 |
| H | -2.411456 | 9.105542  | 9.451230 |

|    |           |           |           |
|----|-----------|-----------|-----------|
| H  | -2.894829 | 10.548666 | 8.530783  |
| H  | -1.222371 | 9.947986  | 8.460238  |
| C  | -5.169555 | 8.902349  | 4.446162  |
| H  | -4.761397 | 9.289002  | 3.499784  |
| H  | -5.756118 | 9.706897  | 4.907838  |
| H  | -5.853602 | 8.081135  | 4.189646  |
| C  | -1.643822 | 5.501862  | 5.602641  |
| H  | -0.552259 | 5.626799  | 5.569862  |
| H  | -1.978900 | 5.107010  | 4.635517  |
| H  | -1.845260 | 4.739051  | 6.370220  |
| C  | -1.961248 | 7.565326  | 7.057378  |
| B  | -0.817304 | 7.065341  | 7.975668  |
| Ru | 0.632066  | 6.399230  | 9.088708  |
| H  | -0.668266 | 7.588823  | 9.219290  |
| H  | -0.792777 | 5.734194  | 8.302617  |
| H  | 0.485315  | 7.185030  | 7.528082  |
| C  | 1.457200  | 6.308740  | 11.092632 |
| C  | 1.189535  | 4.973275  | 10.628197 |
| C  | 2.748500  | 5.944627  | 9.184511  |
| C  | 2.424484  | 6.917131  | 10.204055 |
| C  | 0.874739  | 6.944176  | 12.314818 |
| H  | 1.508449  | 6.749260  | 13.195007 |
| H  | -0.126744 | 6.551693  | 12.528064 |
| H  | 0.790608  | 8.031846  | 12.197237 |
| C  | 0.296307  | 3.971474  | 11.285084 |
| H  | 0.860417  | 3.346528  | 11.997005 |
| H  | -0.164725 | 3.302444  | 10.547386 |
| H  | -0.513638 | 4.460649  | 11.839914 |
| C  | 2.067045  | 3.469010  | 8.667855  |
| H  | 2.339934  | 3.650952  | 7.621129  |
| H  | 1.104035  | 2.943534  | 8.674283  |
| H  | 2.821871  | 2.791219  | 9.099437  |
| C  | 3.743400  | 6.132925  | 8.084439  |
| H  | 3.783930  | 7.178933  | 7.757816  |
| H  | 3.495136  | 5.518737  | 7.209947  |
| H  | 4.753145  | 5.845855  | 8.420187  |
| C  | 3.042434  | 8.269102  | 10.364247 |
| H  | 3.945303  | 8.221310  | 10.995100 |
| H  | 2.344196  | 8.974086  | 10.832776 |
| H  | 3.335685  | 8.689339  | 9.394448  |
| C  | 1.990174  | 4.746862  | 9.440398  |

Cartesian coordinates for the calculated structure of **3b** (in Å).

|    |          |           |           |
|----|----------|-----------|-----------|
| B  | 6.453515 | 13.992987 | 4.550730  |
| H  | 7.065981 | 15.157124 | 4.213297  |
| H  | 6.055192 | 13.588718 | 3.293663  |
| H  | 7.588097 | 13.215074 | 4.673122  |
| C  | 5.407979 | 13.939541 | 5.698087  |
| C  | 4.915066 | 15.117180 | 6.322800  |
| C  | 3.976329 | 15.011195 | 7.350847  |
| H  | 3.595768 | 15.918258 | 7.820333  |
| C  | 3.498820 | 13.771150 | 7.790497  |
| C  | 3.985250 | 12.619531 | 7.170061  |
| H  | 3.611457 | 11.650644 | 7.505431  |
| C  | 4.922055 | 12.679706 | 6.132951  |
| C  | 5.434480 | 16.486444 | 5.904784  |
| H  | 5.624657 | 16.442290 | 4.821147  |
| C  | 6.777197 | 16.777395 | 6.600273  |
| H  | 6.642202 | 16.809914 | 7.691588  |
| H  | 7.183916 | 17.746231 | 6.274963  |
| H  | 7.520064 | 16.000984 | 6.373139  |
| C  | 4.447634 | 17.635276 | 6.143896  |
| H  | 3.463790 | 17.421542 | 5.705193  |
| H  | 4.832422 | 18.559309 | 5.690946  |
| H  | 4.304779 | 17.836541 | 7.214957  |
| C  | 2.465847 | 13.677726 | 8.897804  |
| H  | 2.270526 | 12.605819 | 9.065092  |
| C  | 1.139389 | 14.337456 | 8.483401  |
| H  | 0.378035 | 14.210760 | 9.267192  |
| H  | 0.753818 | 13.898611 | 7.553656  |
| H  | 1.273128 | 15.415748 | 8.314598  |
| C  | 2.988596 | 14.270924 | 10.216408 |
| H  | 3.924164 | 13.785898 | 10.524593 |
| H  | 2.250512 | 14.141817 | 11.021629 |
| H  | 3.186721 | 15.347140 | 10.111761 |
| C  | 5.443688 | 11.391274 | 5.510253  |
| H  | 5.797206 | 11.635457 | 4.497634  |
| C  | 4.375506 | 10.298992 | 5.367483  |
| H  | 4.045302 | 9.913744  | 6.343009  |
| H  | 4.780445 | 9.446729  | 4.803957  |
| H  | 3.490696 | 10.673615 | 4.836006  |
| C  | 6.656766 | 10.873573 | 6.304248  |
| H  | 7.456323 | 11.626631 | 6.339797  |
| H  | 7.063916 | 9.961057  | 5.844892  |
| H  | 6.368450 | 10.638245 | 7.338854  |
| Ru | 7.755771 | 13.968126 | 3.108223  |

|   |           |           |           |
|---|-----------|-----------|-----------|
| C | 8.058960  | 13.831563 | 0.963171  |
| C | 8.628683  | 15.061518 | 1.443996  |
| C | 9.665192  | 14.729657 | 2.403150  |
| C | 9.726338  | 13.294728 | 2.505546  |
| C | 8.731890  | 12.730664 | 1.620049  |
| C | 10.685260 | 12.515193 | 3.348148  |
| H | 10.251228 | 11.559185 | 3.664573  |
| H | 11.607366 | 12.296020 | 2.786700  |
| H | 10.966645 | 13.069907 | 4.251468  |
| C | 8.500363  | 11.276171 | 1.364193  |
| H | 7.458237  | 11.084723 | 1.079971  |
| H | 9.143346  | 10.906805 | 0.548508  |
| H | 8.714978  | 10.674296 | 2.256435  |
| C | 6.988507  | 13.705455 | -0.072419 |
| H | 6.311993  | 14.569125 | -0.056145 |
| H | 7.426487  | 13.640258 | -1.081467 |
| H | 6.384580  | 12.804043 | 0.088490  |
| C | 8.270369  | 16.439530 | 0.988020  |
| H | 8.407038  | 17.173918 | 1.791854  |
| H | 8.902492  | 16.751437 | 0.140922  |
| H | 7.224224  | 16.492504 | 0.662421  |
| C | 10.555338 | 15.706473 | 3.101797  |
| H | 11.433062 | 15.955716 | 2.483668  |
| H | 10.026531 | 16.642388 | 3.321754  |
| H | 10.920959 | 15.302591 | 4.053239  |

Cartesian coordinates for the calculated structure of **3c** (in Å).

|   |          |           |          |
|---|----------|-----------|----------|
| B | 3.837121 | 9.923125  | 3.380534 |
| C | 3.992026 | 11.163302 | 4.302992 |
| C | 4.873010 | 11.168517 | 5.418963 |
| C | 5.622306 | 10.016783 | 5.812683 |
| H | 5.504478 | 9.096012  | 5.243890 |
| C | 6.470978 | 10.042505 | 6.893390 |
| H | 7.023649 | 9.143971  | 7.169321 |
| C | 6.634826 | 11.229264 | 7.659242 |
| H | 7.314200 | 11.234543 | 8.512056 |
| C | 5.932110 | 12.359668 | 7.324824 |
| H | 6.041862 | 13.275842 | 7.908056 |
| C | 5.035224 | 12.368876 | 6.213935 |
| C | 4.308912 | 13.517139 | 5.880868 |
| H | 4.438279 | 14.421428 | 6.480539 |
| C | 3.414600 | 13.533879 | 4.805296 |
| C | 2.666739 | 14.706051 | 4.481031 |
| H | 2.813146 | 15.598729 | 5.092036 |

|    |          |           |           |
|----|----------|-----------|-----------|
| C  | 1.783966 | 14.714458 | 3.430245  |
| H  | 1.218522 | 15.615875 | 3.193137  |
| C  | 1.603047 | 13.540549 | 2.648830  |
| H  | 0.894441 | 13.551285 | 1.819695  |
| C  | 2.311277 | 12.395425 | 2.927345  |
| H  | 2.159504 | 11.504925 | 2.318948  |
| C  | 3.246746 | 12.339123 | 4.006329  |
| C  | 4.433782 | 7.318754  | 0.490136  |
| C  | 3.148052 | 7.865325  | 0.111461  |
| C  | 2.146564 | 7.313875  | 0.987003  |
| C  | 2.808564 | 6.417785  | 1.915629  |
| C  | 4.215395 | 6.429195  | 1.606935  |
| C  | 5.735954 | 7.568978  | -0.199866 |
| H  | 5.768630 | 8.574934  | -0.636828 |
| H  | 5.899280 | 6.845181  | -1.014925 |
| H  | 6.579145 | 7.484648  | 0.497095  |
| C  | 2.901450 | 8.799665  | -1.029431 |
| H  | 2.005212 | 9.408654  | -0.859642 |
| H  | 2.755203 | 8.239843  | -1.966991 |
| H  | 3.746842 | 9.483213  | -1.176844 |
| C  | 0.674070 | 7.560581  | 0.911306  |
| H  | 0.207363 | 7.505407  | 1.902997  |
| H  | 0.183409 | 6.812698  | 0.267465  |
| H  | 0.455888 | 8.552684  | 0.497615  |
| C  | 2.138002 | 5.579345  | 2.956117  |
| H  | 2.802697 | 5.396740  | 3.809500  |
| H  | 1.841448 | 4.601177  | 2.544855  |
| H  | 1.233397 | 6.067519  | 3.338693  |
| C  | 5.268204 | 5.617998  | 2.292256  |
| H  | 6.235968 | 6.134443  | 2.286611  |
| H  | 5.401282 | 4.648437  | 1.787041  |
| H  | 5.001025 | 5.417074  | 3.336634  |
| H  | 2.649175 | 9.232150  | 3.408243  |
| H  | 4.698987 | 8.882724  | 3.458757  |
| H  | 3.921902 | 10.149863 | 2.024173  |
| Ru | 3.588640 | 8.432934  | 2.154218  |
